# Supplementary material
Source: publisher site journal article supplement (https://www.dovepress.com/article/278327)
Supplement: Supplementary file 1 [file get_supplementary_file.php]

**Supplementary Table 1. Primers of reverse transcription PCR analysis for genes**

| Gene | **Forward primer** | **Reverse primer** |
| --- | --- | --- |
| *Actin* | GCAGGAGTACGATGAGTCCG | ACGCAGCTCAGTAACAGTCC |
| *TNF-α* | AAATGGGCTCCCTCTCATCAGTTC | TCTGCTTGGTGGTTTGCTACGAC |
| *IL-6* | TCCTACCCCAACTTCCAATGCTC | TTGGATGGTCTTGGTCCTTAGCC |
| *Fbxo32* | CCATCAGGAGAAGTGGATCTATGTT | GCTTCCCCCAAAGTGCAGTA |
| *Nedd4l* | CCTCGGAATCAGACAATAACATCAG | GCAACCTTCGGCTCACTTCT |
| *Foxo3* | TGCCGATGGGTTGGATTT | CCAGTGAAGTTCCCCACGTT |
| *Megf10* | GAAGACCCCAATGTATGCAG | ATGTCGGTGCAGCTTGTGTA |
| *Cdk1* | GGAACAGAGAGGGTCCGTTG | GATCTGGCCAGTAGTCCTGTG |
| *Ccnb1* | TTAAAGCCCTACCAAAACC | CAAGAATCACATCGGAGAA |
| *Plk3* | GATAACATGGAACTGAAGG | TACATGACACAACCAAGG |
| *Gpsm1* | AGAGTCTTCTCCCTCAAGCC | TACCTCCTTCATAGCCGTCC |
| *Ptgs2* | CCACTTCAAGGGAGTCTGGA | GAAGGGCCCTGGTGTAGTAG |
| *Sik1* | GGCGACTACAACGAGCAGGT | GCAGGAGGTAGTAAATAGCCGC |
| *Myh4* | GAGGACCGCAAGAACGTG | TGTGTGATTTCTTCTGTCACC |
| *Atp5f1* | CGAGATATGTGAGCGGCCAT | GAAAGTACCACCCGGGACAG |

**Supplementary Table 2. Comparison of the pulmonary function changes post CS exposure**

| Characteristics | CON12W  (n=6) | CS12W  (n=6) | CON24W  (n=6) | CS24W  (n=6) |
| --- | --- | --- | --- | --- |
| RE (cmH2Oxs/mL)△ | 0.26±0.03 | 0.32±0.07 | 0.25±0.01 | 0.40±0.22 |
| Cdy (mL/cmH2O)△ | 0.24±0.04 | 0.25±0.03 | 0.31±0.01 | 0.27±0.07 |

△*P*＞0.05 among the four groups. Abbreviations: RE, expiratory resistance; Cdy, dynamic lung compliance.

**Supplementary Table 3. Comparison of** **twitch kinetics post CS exposure**

| Characteristics | CON12W  (n=6) | CS12W  (n=6) | CON24W  (n=6) | CS24W  (n=6) |
| --- | --- | --- | --- | --- |
| Pt/CSA (g/cm2) | 208.76±36.61 | 143.67±51.29* | 223.07±136.07 | 68.20±47.42* |
| CT (ms) | 45.48±8.34 | 37.92±7.32 | 60.31±27.02 | 154.49±117.01 |
| 1/2RT (ms) | 25.03±5.55 | 20.63±5.30 | 22.59±6.31 | 74.88±98.74 |

*: *P*＜0.05, CS vs. CON at the same duration of CS or room-air exposures. Abbreviations: Pt, peak twitch tension; CSA, cross-sectional area; CT, contraction time; 1/2RT, the time required from peak tension to half relaxation.

**Supplementary Table 4. Sequencing depth in individual rat samples**

| Sample | RIN | Total reads | clean bases | Valid bases | Q30 | GC | Reads mapped  in proper pairs |
| --- | --- | --- | --- | --- | --- | --- | --- |
| CON12W | 9.1 | 48786678 | 6.62G | 88.78% | 94.08% | 49.08% | 41033868(84.11%) |
|  | 9.2 | 48521094 | 6.56G | 88.47% | 94.28% | 49.31% | 40779772(84.05%) |
|  | 9.3 | 55496112 | 7.51G | 88.55% | 94.04% | 49.38% | 46818384(84.36%) |
| CS12W | 9.0 | 57468658 | 7.84G | 89.31% | 94.14% | 49.49% | 48280486(84.01%) |
|  | 9.1 | 46254844 | 6.28G | 88.92% | 94.23% | 49.80% | 39102762(84.54%) |
|  | 8.1 | 52398264 | 7.08G | 88.42% | 94.21% | 49.05% | 44083896(84.13%) |
| CON24W | 9.2 | 54777742 | 8.08G | 96.33% | 96.41% | 48.67% | 48308394(88.19%) |
|  | 9.1 | 51348064 | 7.58G | 96.30% | 96.38% | 48.69% | 45441444(88.50%) |
|  | 8.8 | 54511368 | 8.05G | 96.26% | 96.34% | 49.85% | 48194836(88.41%) |
| CS24W | 9.0 | 55937468 | 8.26G | 96.11% | 96.14% | 49.80% | 49457480(88.42%) |
|  | 9.1 | 51452892 | 7.60G | 96.34% | 96.42% | 48.37% | 45403904(88.24%) |
|  | 8.9 | 51156438 | 7.54G | 96.06% | 96.19% | 49.58% | 45208670(88.37%) |

**Supplementary Table 5. Differentially expressed genes between CS12W and CON12W groups**

| Gene_id | Fold Change | log2FoldChange | *P* value |
| --- | --- | --- | --- |
| Abca8a | 0.647387889 | -0.627297718 | 0.012091962 |
| Abca9 | 0.470094999 | -1.088975762 | 7.31E-06 |
| Abcb7 | 0.52453887 | -0.93087841 | 0.002035674 |
| Abhd2 | 0.612643168 | -0.706881069 | 0.011986077 |
| Acacb | 0.638523739 | -0.647187838 | 0.000353179 |
| Acadsb | 0.598220762 | -0.741250113 | 0.010257427 |
| Acer2 | 1.735739178 | 0.795550177 | 0.04400167 |
| Acss1 | 0.622613287 | -0.68359173 | 0.002338707 |
| Adcy1 | 0.599758372 | -0.737546704 | 0.010141574 |
| Adgre1 | 0.33934887 | -1.559158886 | 5.75E-05 |
| Adgre4 | 0.317237792 | -1.65636345 | 0.003385474 |
| Adgrg1 | 1.853191163 | 0.890011708 | 0.002363663 |
| Adra1a | 0.546551333 | -0.871571092 | 0.006642611 |
| Adra2b | 2.010081105 | 1.007253714 | 0.047539105 |
| Ago2 | 0.501015105 | -0.997073996 | 2.08E-05 |
| Ago3 | 0.546812004 | -0.87088318 | 0.006414211 |
| Agps | 0.541263355 | -0.885597379 | 0.001213081 |
| Ahi1 | 0.66430709 | -0.590077783 | 0.041863839 |
| Ak4 | 0.605202087 | -0.724511133 | 0.007027224 |
| Alkbh5 | 0.632833019 | -0.660103217 | 0.002647631 |
| Alox5 | 0.624292405 | -0.679706181 | 0.038700912 |
| Alox5ap | 0.499699099 | -1.000868477 | 0.001621699 |
| Alpk2 | 0.58888869 | -0.76393313 | 0.011077278 |
| Alpk3 | 0.633449669 | -0.658698101 | 0.000240637 |
| Angptl1 | 0.508794332 | -0.974845495 | 0.00038975 |
| Ankrd2 | 1.828637397 | 0.87076903 | 0.002251269 |
| Ankrd52 | 0.403593132 | -1.309026472 | 8.26E-11 |
| Ankrd6 | 0.663737552 | -0.591315195 | 0.047836181 |
| Anln | 2.021514689 | 1.015436687 | 0.048793769 |
| Anlnl1 | 4.701235386 | 2.233039916 | 0.026329689 |
| Aoah | 0.225145976 | -2.151067401 | 0.013269227 |
| Ap1g1 | 0.643524297 | -0.635933475 | 0.001213226 |
| Ap4e1 | 0.570600347 | -0.809447471 | 0.001021045 |
| Apba1 | 0.344423738 | -1.537743517 | 0.013862461 |
| Apbb1ip | 0.537294909 | -0.896213926 | 0.004196246 |
| Apitd1 | 1.758716987 | 0.814523343 | 0.009828097 |
| Aqp9 | 0 | #NAME? | 0.038301246 |
| Ar | 0.397414594 | -1.331283242 | 0.02142422 |
| Arhgap30 | 0.390939973 | -1.354980991 | 0.001217794 |
| Arhgap45 | 0.549679787 | -0.863336666 | 0.006903005 |
| Arhgap5 | 0.616935419 | -0.69680862 | 0.000305946 |
| Arhgef15 | 1.502600661 | 0.587461642 | 0.010057801 |
| Arhgef39 | 3.042720224 | 1.605361685 | 0.049593327 |
| Armc2 | 0.5024941 | -0.992821437 | 0.00737216 |
| Asmtl | 1.511382548 | 0.59586887 | 0.003391527 |
| Aspm | 2.416388609 | 1.272852491 | 0.0085343 |
| Asz1 | 0 | #NAME? | 0.007022184 |
| Atad2b | 0.430977835 | -1.214314422 | 0.000329074 |
| Ate1 | 0.623372361 | -0.681833904 | 0.020046163 |
| Atf2 | 0.653361536 | -0.614046569 | 0.009567789 |
| Atp13a3 | 0.338115465 | -1.564412089 | 0.000438411 |
| Atp1a3 | 0.296041742 | -1.756127483 | 0.018478811 |
| Atp6ap1l | 4.608875967 | 2.204414943 | 0.049058825 |
| Atp8a1 | 0.638475561 | -0.647296697 | 0.000274788 |
| Atp8b4 | 0.405905492 | -1.300784235 | 0.01588396 |
| Atxn1 | 0.470177334 | -1.088723103 | 0.000275085 |
| Aurkb | 4.78150913 | 2.25746603 | 0.002915056 |
| Bach1 | 0.584156096 | -0.775574163 | 0.019519962 |
| Bcam | 1.567780554 | 0.648723636 | 0.000331962 |
| Bdh1 | 0.598850782 | -0.739731529 | 0.000124912 |
| Bdkrb2 | 1.601615647 | 0.679527974 | 0.0499875 |
| Bdnf | 0.504106656 | -0.988199093 | 0.033222698 |
| Blnk | 0.365675844 | -1.451362769 | 0.020508384 |
| Bmt2 | 0.645107819 | -0.632387792 | 0.01094813 |
| Brpf3 | 0.656981915 | -0.606074437 | 0.009825718 |
| Bves | 0.615293391 | -0.700653599 | 0.032224333 |
| C3ar1 | 0.419241717 | -1.254145813 | 0.016401451 |
| C6 | 0.417490386 | -1.260185119 | 0.001490021 |
| C7 | 0.589498321 | -0.762440392 | 0.03485466 |
| Cacna1h | 1.671775046 | 0.741380732 | 0.030785527 |
| Car9 | 4.98978763 | 2.318978414 | 0.009613602 |
| Carns1 | 1.67162381 | 0.741250213 | 0.000636696 |
| Casc3 | 0.666545599 | -0.585224521 | 0.005069067 |
| Cass4 | 0.348330866 | -1.521469776 | 0.04249394 |
| Cblc | 2.987175893 | 1.57878219 | 1.35E-09 |
| Ccbe1 | 0.596537531 | -0.745315188 | 0.027601088 |
| Ccdc152 | 3.393152044 | 1.762626077 | 0.028757067 |
| Ccl24 | 0.387872845 | -1.366344319 | 0.000287399 |
| Ccl6 | 0.365588186 | -1.451708645 | 6.35E-07 |
| Ccna2 | 4.465004712 | 2.158661698 | 2.68E-05 |
| Ccnb1 | 2.802753143 | 1.486844682 | 0.015732409 |
| Ccnd1 | 1.57851552 | 0.658568445 | 0.011088462 |
| Ccr1 | 0.349370381 | -1.517170789 | 0.000401913 |
| Ccr3 | 0.060765475 | -4.040604331 | 0.019524136 |
| Ccr5 | 0.359643915 | -1.475358899 | 0.000410162 |
| Cd163 | 0.380492901 | -1.394058558 | 8.77E-07 |
| Cd19 | 0.043358708 | -4.527534426 | 0.023396505 |
| Cd28 | 0.513974871 | -0.96023027 | 0.016966051 |
| Cd300lg | 3.059526383 | 1.61330834 | 9.60E-09 |
| Cd36 | 0.610992228 | -0.710774066 | 0.000121953 |
| Cd4 | 0.506225407 | -0.982148177 | 4.44E-06 |
| Cd53 | 0.529750014 | -0.916616374 | 0.001518678 |
| Cd68 | 0.629569837 | -0.667561673 | 0.045051926 |
| Cd79b | 0.115989525 | -3.107933578 | 0.032536381 |
| Cdc20 | 2.390800022 | 1.257493461 | 0.002270423 |
| Cdca2 | 5.337891899 | 2.416270089 | 0.03292799 |
| Cdca3 | 3.742319751 | 1.90393283 | 0.011548356 |
| Cdh13 | 1.503465784 | 0.588292036 | 0.001286691 |
| Cdh5 | 1.515491718 | 0.599785968 | 0.028926228 |
| Cdhr3 | 1.800467045 | 0.848371193 | 0.021822757 |
| Cdk1 | 3.087062819 | 1.626234841 | 0.001073389 |
| Cdk12 | 0.615912331 | -0.699203082 | 0.00212323 |
| Cdkn1a | 0.520473983 | -0.942102047 | 0.012939917 |
| Cdkn2c | 1.991746988 | 0.994034393 | 0.034585369 |
| Cdkn3 | 7.038472755 | 2.815262419 | 0.001499107 |
| Ceacam16 | Inf | Inf | 0.00664098 |
| Cenpf | 3.859726065 | 1.948498459 | 0.000824135 |
| Cenph | 5.17697494 | 2.372109335 | 0.021860028 |
| Cenpt | 8.044495584 | 3.008001962 | 0.008095893 |
| Cep350 | 0.561780388 | -0.831921834 | 0.001041048 |
| Cep85l | 0.440383962 | -1.183166164 | 0.000633693 |
| Cfp | 0.556014581 | -0.846805379 | 0.007943146 |
| Chad | 0.132467696 | -2.916287512 | 0.000961277 |
| Chd7 | 0.559722451 | -0.837216479 | 0.000688009 |
| Chek1 | 2.872220518 | 1.522166518 | 0.005209349 |
| Chi3l1 | 0.624152104 | -0.680030443 | 0.043809437 |
| Chrnd | 1.61431107 | 0.690918606 | 0.000969368 |
| Chrng | 2.99368439 | 1.581922133 | 0.028824139 |
| Cilp | 0.43867163 | -1.188786688 | 1.71E-09 |
| Cilp2 | 0.17305084 | -2.530732153 | 0.018132921 |
| Cish | 0.398645119 | -1.32682309 | 0.021617048 |
| Ckap2 | 4.238242308 | 2.083466072 | 0.000186916 |
| Cks2 | 4.235521863 | 2.082539737 | 0.007646175 |
| Clec10a | 0.511251277 | -0.967895554 | 2.72E-05 |
| Clec1a | 1.730752331 | 0.791399291 | 0.018453894 |
| Clec4a1 | 0.483948442 | -1.047074739 | 0.010446 |
| Clec4d | 0.352693699 | -1.503512293 | 0.009700152 |
| Clec7a | 0.33774351 | -1.566000047 | 0.002533191 |
| Clip4 | 0.607747123 | -0.718456937 | 0.042168537 |
| Clock | 0.650791583 | -0.619732503 | 0.015799127 |
| Cndp1 | 0.390239018 | -1.357570061 | 0.003188674 |
| Cnksr2 | 2.827423361 | 1.49948792 | 0.035643256 |
| Col12a1 | 0.355630133 | -1.491550526 | 0.006758712 |
| Col4a6 | 0.505628954 | -0.983849015 | 0.027141701 |
| Col8a1 | 0.533058649 | -0.907633822 | 0.025245095 |
| Col8a2 | 0.567754826 | -0.81666003 | 0.002234856 |
| Coro1a | 0.576549899 | -0.79448262 | 0.014854012 |
| Cpa1 | 2.077433186 | 1.054802078 | 0.013812972 |
| Cpa3 | 0.430110708 | -1.217220047 | 4.12E-05 |
| Cpd | 0.583916273 | -0.776166578 | 0.000566923 |
| Cpeb4 | 0.628307008 | -0.670458423 | 0.000396453 |
| Cpne2 | 1.583442738 | 0.663064696 | 0.042099682 |
| Csf1r | 0.486798556 | -1.038603205 | 2.24E-07 |
| Csf2rb | 0.475087976 | -1.073733402 | 0.017677305 |
| Csf3r | 0.39694371 | -1.332993658 | 0.035641328 |
| Cspg5 | 2.350010393 | 1.232667137 | 0.043433108 |
| Ctse | 0.387346413 | -1.368303715 | 0.003411508 |
| Ctss | 0.597907639 | -0.742005453 | 0.001978825 |
| Cxcl10 | 2.575610204 | 1.364914271 | 0.026055723 |
| Cxcl12 | 1.802167008 | 0.849732713 | 0.014913858 |
| Cybb | 0.189103437 | -2.402752509 | 8.89E-08 |
| Cyp1a1 | 32.62674471 | 5.027983147 | 3.51E-09 |
| Cyp1b1 | 0.624783365 | -0.678572053 | 0.004728291 |
| Cyp26a1 | 0 | #NAME? | 0.027122178 |
| Cyp27a1 | 1.584056796 | 0.663624063 | 0.000901025 |
| Cyp2j4 | 3.008364151 | 1.58897921 | 0.006644404 |
| Cyp4v3 | 0.491907539 | -1.023540929 | 0.018823318 |
| Cyyr1 | 2.019005459 | 1.013644811 | 0.023581808 |
| D2hgdh | 0.632914248 | -0.659918049 | 0.015468559 |
| Dach1 | 1.922283374 | 0.942821027 | 0.018960925 |
| Dbi | 1.587021955 | 0.666322087 | 0.00022686 |
| Dclk2 | 1.790034132 | 0.839987097 | 0.039547705 |
| Dcn | 0.532470054 | -0.909227703 | 2.91E-07 |
| Dcx | 3.630136467 | 1.860023784 | 0.022445499 |
| Ddx58 | 1.649288628 | 0.721843895 | 0.002615805 |
| Dennd4a | 0.60545388 | -0.723911026 | 0.001132271 |
| Dennd5b | 0.596448618 | -0.745530235 | 0.000852545 |
| Depdc1 | 5.540482191 | 2.47001154 | 0.037809733 |
| Dhh | 2.232713464 | 1.158798114 | 0.029927411 |
| Dhodh | 1.590463696 | 0.669447441 | 0.044991355 |
| Disp2 | 1.902907967 | 0.928205789 | 0.036053698 |
| Dnal1 | 0.594156366 | -0.751085434 | 0.006781477 |
| Dnase1l3 | 0.342486182 | -1.545882312 | 0.044605127 |
| Dock2 | 0.586195278 | -0.770546749 | 0.039346656 |
| Dok2 | 0.482094834 | -1.052611126 | 0.002286883 |
| Dok3 | 0.407535747 | -1.295001484 | 0.018061502 |
| Dpt | 0.652406889 | -0.61615608 | 0.00052307 |
| Dpy19l4 | 0.654304863 | -0.611965101 | 0.008555157 |
| Dsn1 | 3.38577849 | 1.75948759 | 0.014505372 |
| Dtl | 3.544609503 | 1.8256267 | 0.045337105 |
| Dync1h1 | 0.629651667 | -0.667374166 | 0.025243445 |
| Dzank1 | 0.4203358 | -1.250385759 | 0.009562723 |
| E2f1 | 3.116093673 | 1.639738603 | 0.000859934 |
| Ebf1 | 1.550886544 | 0.633093149 | 0.021733043 |
| Ecm2 | 0.342255907 | -1.546852654 | 0.002975318 |
| Ecscr | 1.506057127 | 0.590776495 | 0.028765511 |
| Ect2 | 7.131717437 | 2.834249544 | 3.84E-06 |
| Eea1 | 0.593213377 | -0.753376965 | 0.0001728 |
| Efcab12 | 12.12112509 | 3.599451711 | 0.049422516 |
| Egfl8 | 1.711064483 | 0.77489413 | 0.017912895 |
| Eif4ebp2 | 0.579960687 | -0.785972986 | 0.035441904 |
| Eif4ebp3 | 1.647296241 | 0.720100025 | 0.047886735 |
| Elac1 | 0.646377546 | -0.629551013 | 0.025181667 |
| Ell3 | 2.26580492 | 1.180023654 | 0.012771283 |
| Emcn | 1.673266942 | 0.742667622 | 0.003016514 |
| Emilin2 | 0.635155688 | -0.65481783 | 0.010758014 |
| Enc1 | 0.539844136 | -0.889385164 | 0.013382373 |
| Enpp3 | 0.637253246 | -0.650061278 | 0.009033217 |
| Epb41l4a | 1.567415089 | 0.648387291 | 0.026638303 |
| Ephx1 | 1.545222726 | 0.627814801 | 0.021255261 |
| Epm2a | 0.644462472 | -0.633831744 | 0.034995703 |
| Eqtn | 2.149478934 | 1.103986971 | 0.008760065 |
| Esam | 1.51947065 | 0.603568808 | 0.029455496 |
| Exoc3l1 | 1.574572761 | 0.654960426 | 0.017223625 |
| F13a1 | 0.460336556 | -1.119239082 | 1.78E-06 |
| F5 | 0.13497732 | -2.889211085 | 0.003029097 |
| Fa2h | 7.658227239 | 2.937010469 | 0.03313057 |
| Fam101b | 0.633937275 | -0.657587996 | 0.035287999 |
| Fam126a | 0.59702397 | -0.74413924 | 0.006349191 |
| Fam126b | 0.606808128 | -0.720687685 | 0.000369597 |
| Fam134b | 0.222582144 | -2.167590235 | 0.031626145 |
| Fam159b | 7.717860479 | 2.948200964 | 0.03006782 |
| Fam185a | 0.655529142 | -0.609268176 | 0.029352466 |
| Fam213b | 1.874087544 | 0.906188347 | 0.001823387 |
| Fam64a | 16.6516136 | 4.057590082 | 0.000466352 |
| Fam71e1 | 1.744206282 | 0.802570673 | 0.039157001 |
| Fam78b | 3.199254595 | 1.677735806 | 0.019914639 |
| Fap | 0.579093787 | -0.788131076 | 0.00946095 |
| Fbln1 | 0.655313572 | -0.609742684 | 0.004683476 |
| Fbln7 | 0.288897435 | -1.791370701 | 0.002610636 |
| Fbxl18 | 0.51638954 | -0.953468318 | 0.041426431 |
| Fbxo32 | 0.453316783 | -1.141408519 | 0.004349926 |
| Fbxo44 | 1.52442082 | 0.608261217 | 0.029067793 |
| Fcer1a | 0.351347717 | -1.509028572 | 0.044087501 |
| Fcgr1a | 0.507854754 | -0.977512147 | 0.012033981 |
| Fcgr2b | 0.456078523 | -1.13264586 | 0.001934911 |
| Fcmr | 0.61683815 | -0.697036101 | 0.041592689 |
| Fcna | 0.595295082 | -0.74832312 | 0.007909894 |
| Filip1 | 0.587308945 | -0.767808485 | 0.000490946 |
| Flt1 | 1.779972735 | 0.831855143 | 0.042453279 |
| Fmn1 | 0.400930383 | -1.318576342 | 0.000218738 |
| Fn1 | 0.485060254 | -1.043764125 | 0.001165705 |
| Fnip1 | 0.624127471 | -0.680087381 | 0.000294541 |
| Foxk1 | 0.63108523 | -0.664093236 | 0.023052065 |
| Foxm1 | 2.332441177 | 1.221840697 | 0.030458691 |
| Foxo3 | 0.554882119 | -0.849746783 | 0.037221422 |
| Fpgt | 0.636210572 | -0.65242375 | 0.02848114 |
| Frat2 | 0.507807382 | -0.977646727 | 0.005783219 |
| Fscn1 | 1.558258448 | 0.639934534 | 0.043402726 |
| Fxyd2 | 0.590670736 | -0.759573957 | 0.016365732 |
| Fyb | 0.494286925 | -1.016579351 | 0.00517008 |
| Galnt14 | 12.37834729 | 3.629746799 | 0.019706905 |
| Galnt15 | 0.380488325 | -1.394075908 | 1.42E-07 |
| Gfra3 | 2.703277412 | 1.43470957 | 0.049361727 |
| Ggt5 | 1.808703514 | 0.854955938 | 0.014640267 |
| Gjc1 | 1.573736209 | 0.654193736 | 0.011494952 |
| Gna13 | 0.437185614 | -1.193682165 | 4.34E-05 |
| Gnl3l | 0.616259678 | -0.698389696 | 0.008452322 |
| Gpd1l | 0.639114057 | -0.645854676 | 0.012631226 |
| Gper1 | 1.705033361 | 0.769799968 | 0.039114555 |
| Gpihbp1 | 1.698915288 | 0.764613918 | 0.003762275 |
| Gpnmb | 0.516471469 | -0.953239442 | 0.005912014 |
| Gpr27 | 0.042120382 | -4.569337677 | 5.64E-06 |
| Gpt | 1.531885259 | 0.61530824 | 0.00108301 |
| Grik4 | 2.127187507 | 1.08894721 | 0.044481971 |
| Gsn | 0.52857782 | -0.919812206 | 1.79E-07 |
| Gstt4 | 3.062613122 | 1.614763133 | 0.047568038 |
| Gstz1 | 0.655085257 | -0.610245415 | 0.041559967 |
| Gtf2ird1 | 1.662175616 | 0.733072817 | 0.044161635 |
| Hcfc1 | 0.52453928 | -0.930877281 | 0.016305316 |
| Herc6 | 1.605934753 | 0.683413279 | 0.00963748 |
| Hexim2 | 1.64918685 | 0.721754862 | 0.02746311 |
| Hif1an | 0.495092113 | -1.014231128 | 0.000122925 |
| Hipk2 | 0.494140876 | -1.017005692 | 0.013165488 |
| Hjurp | 5.717738711 | 2.515444693 | 0.000373034 |
| Hlx | 1.590272506 | 0.669274004 | 0.002516613 |
| Hmgcs2 | 0.299318921 | -1.740244617 | 2.32E-05 |
| Hopx | 1.643466197 | 0.716741784 | 0.049298844 |
| Hspa13 | 0.659994288 | -0.599474557 | 0.018862861 |
| Hspb6 | 1.638506517 | 0.712381411 | 0.001078322 |
| Htr1b | 0.253018299 | -1.982686368 | 0.049838745 |
| Ifi27 | 1.607600325 | 0.684908774 | 0.01317963 |
| Ifit1 | 2.870416812 | 1.521260245 | 1.86E-05 |
| Igsf11 | 2.987520668 | 1.578948694 | 0.028730779 |
| Igsf6 | 0.409532146 | -1.287951396 | 0.006525261 |
| Ikzf1 | 0.414759623 | -1.26965264 | 0.024245875 |
| Il17b | 12.24003645 | 3.613535949 | 0.020094191 |
| Il18rap | 0.208250259 | -2.263609806 | 0.032670522 |
| Il1rl1 | 0.337463491 | -1.567196666 | 0.000498865 |
| Il2ra | 0.192292539 | -2.378625307 | 0.019383865 |
| Ing5 | 0.654760107 | -0.610961671 | 0.02342542 |
| Insr | 0.51973828 | -0.944142775 | 0.006614482 |
| Ipcef1 | 0.295693545 | -1.757825344 | 0.01834128 |
| Iqcg | 3.441840555 | 1.783180265 | 0.00035692 |
| Iqgap2 | 0.637107965 | -0.650390221 | 0.03599017 |
| Iqgap3 | 3.238374629 | 1.695269892 | 0.001138259 |
| Irf5 | 0.541890837 | -0.883925842 | 0.019824241 |
| Irf7 | 1.517205904 | 0.601416891 | 0.031306355 |
| Irs1 | 0.442894127 | -1.174966227 | 0.013426453 |
| Itga11 | 0.524214877 | -0.931769797 | 0.00063049 |
| Itgam | 0.1890142 | -2.403433469 | 2.24E-10 |
| Itgb2 | 0.313647536 | -1.672783864 | 3.69E-08 |
| Itgb3bp | 1.889807263 | 0.918239105 | 0.011242051 |
| Itgb4 | 1.702651678 | 0.767783324 | 0.023224262 |
| Itgb7 | 0.252754679 | -1.984190298 | 7.18E-06 |
| Itgbl1 | 0.592853354 | -0.754252805 | 0.005620204 |
| Jag1 | 1.510298493 | 0.594833709 | 0.014545509 |
| Jam2 | 1.518238909 | 0.60239883 | 0.046112378 |
| Kcna5 | 1.890276682 | 0.918597419 | 0.019696774 |
| Kcnip3 | 2.332486478 | 1.221868718 | 0.041636292 |
| Kcnk1 | 4.781657735 | 2.257510867 | 0.000809823 |
| Kcnmb4 | 4.594726147 | 2.199978877 | 0.0180261 |
| Kdm6a | 0.511791545 | -0.966371782 | 0.023197584 |
| Kdr | 1.535565462 | 0.618770016 | 0.040765405 |
| Kera | 0.154546263 | -2.693889321 | 0.003076475 |
| Kif11 | 3.490330876 | 1.803363808 | 0.000940921 |
| Kif1b | 0.547489576 | -0.8690966 | 0.015418026 |
| Kif20a | 7.220856799 | 2.852170032 | 2.13E-05 |
| Kif20b | 3.629818 | 1.859897213 | 0.011927328 |
| Kif22 | 3.594702182 | 1.845872249 | 0.002938085 |
| Kif23 | 3.348846476 | 1.743664239 | 0.009431873 |
| Kif24 | 1.821947744 | 0.865481581 | 0.02585359 |
| Kif5a | 0.662202446 | -0.594655754 | 0.046087711 |
| Klf10 | 0.62132967 | -0.686569147 | 0.015105504 |
| Klkb1 | 41.49292189 | 5.374793349 | 0.028308184 |
| Kntc1 | 2.842674108 | 1.507248714 | 0.023215135 |
| Kpna5 | 0.61041178 | -0.71214529 | 0.002382874 |
| LOC100359972 | 0.264511502 | -1.918597639 | 0.010506486 |
| LOC100360508 | 1.557651601 | 0.639372583 | 0.020563525 |
| LOC100360522 | 1.576511997 | 0.656736148 | 0.011612446 |
| LOC100360679 | 1.738495185 | 0.797839071 | 0.014442677 |
| LOC100363289 | 2.358225585 | 1.237701732 | 0.038540924 |
| LOC100363502 | 1.557367739 | 0.639109646 | 0.034665321 |
| LOC100363531 | 2.861561698 | 1.516802713 | 0.025534039 |
| LOC100909664 | 0.321594033 | -1.636687457 | 0.008577495 |
| LOC100910200 | 0.396483435 | -1.334667503 | 0.006492518 |
| LOC100910385 | 0.450482327 | -1.150457588 | 0.041347184 |
| LOC100910575 | 5.920966163 | 2.565832609 | 0.010228083 |
| LOC100910792 | 2.056188382 | 1.039972446 | 0.031986749 |
| LOC100910885 | 1.597785165 | 0.67607344 | 0.001601993 |
| LOC100911068 | 1.646402537 | 0.719317111 | 0.014038039 |
| LOC100911104 | 1.745448895 | 0.803598116 | 0.029360134 |
| LOC100911313 | 0.279651231 | -1.838299415 | 0.001121035 |
| LOC100912151 | 4.146285101 | 2.05181932 | 0.015518379 |
| LOC100912165 | 0.033434951 | -4.902499175 | 0.012155359 |
| LOC100912350 | 0 | #NAME? | 0.049891436 |
| LOC100912642 | 0.242779004 | -2.042284438 | 0.048602768 |
| LOC102546764 | 2.286978853 | 1.193443026 | 0.003024323 |
| LOC102551518 | 0.582950677 | -0.778554273 | 0.034785107 |
| LOC102552055 | 0.15181027 | -2.719658704 | 0.038438454 |
| LOC102552640 | 1.939800269 | 0.955908113 | 0.032087851 |
| LOC102553014 | 0.101680021 | -3.297891861 | 0.019724163 |
| LOC102554045 | 2.511198449 | 1.328376043 | 0.015908898 |
| LOC102554937 | 0.237001749 | -2.077030391 | 0.040266903 |
| LOC102556346 | 1.904047214 | 0.929069253 | 0.000212411 |
| LOC103689968 | 0.480297411 | -1.058000063 | 0.030094569 |
| LOC103689999 | 0.039298384 | -4.6693862 | 0.010862349 |
| LOC103690089 | 0.530553778 | -0.914429102 | 0.004582928 |
| LOC103690112 | 0.618434378 | -0.693307576 | 0.049822914 |
| LOC103690962 | 0.432640717 | -1.208758649 | 0.009939146 |
| LOC103693367 | 2.970361796 | 1.570638665 | 0.046312121 |
| LOC103693419 | 0.593475668 | -0.752739213 | 0.006839552 |
| LOC103693699 | 0.574888893 | -0.798644937 | 0.016424871 |
| LOC103694069 | 0.478922708 | -1.062135254 | 0.046684811 |
| LOC108348062 | 7.602412842 | 2.926457372 | 0.002362756 |
| LOC108348080 | 45.1093845 | 5.495355696 | 0.033557958 |
| LOC108348175 | 0.621200555 | -0.686868975 | 0.010647285 |
| LOC308990 | 0.462046166 | -1.113891088 | 0.02556337 |
| LOC317456 | 0.478764501 | -1.062611912 | 0.015681054 |
| LOC499235 | 0.578218969 | -0.790312155 | 0.019129345 |
| LOC499770 | 1.760844486 | 0.816267499 | 0.007574142 |
| LOC500300 | 2.146064857 | 1.101693677 | 0.035154898 |
| LOC501266 | 0.471751326 | -1.083901522 | 0.007685358 |
| LOC680989 | 0.296764291 | -1.752610588 | 0.006747871 |
| LOC686087 | 2.017317572 | 1.012438215 | 0.020907939 |
| LOC686774 | 0.644354127 | -0.634074307 | 0.003624654 |
| LOC689800 | 0.403290319 | -1.310109321 | 0.014314254 |
| Lace1 | 1.565920142 | 0.647010641 | 0.002721585 |
| Lama5 | 1.545916295 | 0.628462205 | 0.002702869 |
| Larp4 | 0.626108229 | -0.675516033 | 0.00184607 |
| Lcn2 | 1.832599589 | 0.873891601 | 0.00582129 |
| Ldlr | 2.160921671 | 1.111646779 | 0.012538039 |
| Lgi3 | 3.973420352 | 1.990381426 | 0.032245901 |
| Lgi4 | 1.575878965 | 0.656156734 | 0.039811567 |
| Lin7c | 0.531350153 | -0.912265204 | 9.89E-05 |
| Lmbrd2 | 0.475828798 | -1.071485506 | 2.43E-05 |
| Lonrf2 | 0.646750965 | -0.628717794 | 0.035661774 |
| Lox | 0.644638898 | -0.63343685 | 0.002184815 |
| Lrfn3 | 1.906731589 | 0.93110177 | 0.043479518 |
| Lrp6 | 0.557627304 | -0.842626891 | 0.000297189 |
| Lrrc25 | 0.534691313 | -0.903221857 | 0.030619071 |
| Lrrc32 | 1.556364204 | 0.638179704 | 0.006996468 |
| Lrrc3b | 2.323275269 | 1.216160099 | 0.000194687 |
| Lrrc58 | 0.502971978 | -0.99145007 | 2.93E-05 |
| Ly49si1 | 0.463977563 | -1.107873055 | 0.007432726 |
| Ly6e | 1.621137584 | 0.697006536 | 0.000176829 |
| Lysmd3 | 0.48940234 | -1.030907096 | 0.000398082 |
| Lyz2 | 0.385169635 | -1.376434124 | 8.25E-14 |
| Mafb | 0.539906865 | -0.889217534 | 0.011634117 |
| Magt1 | 0.604389558 | -0.726449359 | 0.000788221 |
| Mamdc2 | 0.579746863 | -0.786504987 | 0.011398603 |
| Mapk1ip1l | 0.660184589 | -0.599058634 | 0.023241386 |
| Masp1 | 1.655662324 | 0.727408462 | 3.32E-05 |
| Mbnl1 | 0.618799996 | -0.692454908 | 0.00011897 |
| Mbnl3 | 2.149457696 | 1.103972716 | 0.046965334 |
| Mcam | 1.55958868 | 0.641165588 | 0.000902807 |
| Mcart1 | 0.463135189 | -1.110494717 | 0.00274799 |
| Mcm3 | 2.176110483 | 1.121751805 | 0.004767148 |
| Mcm5 | 3.41800107 | 1.773152848 | 7.41E-05 |
| Mcm6 | 2.006761638 | 1.004869265 | 0.003300283 |
| Medag | 0.664187427 | -0.590337681 | 0.014744607 |
| Megf10 | 1.55249349 | 0.634587219 | 0.011563321 |
| Melk | Inf | Inf | 4.78E-05 |
| Mettl21c | 2.783718051 | 1.477013095 | 0.010189574 |
| Mfn2 | 0.65232155 | -0.616344804 | 0.014791096 |
| Mga | 0.601822706 | -0.732589556 | 0.000170929 |
| Mgst2 | 1.831020746 | 0.872648137 | 0.030501536 |
| Mib1 | 0.64676087 | -0.628695699 | 0.004230001 |
| Mical3 | 0.617155215 | -0.696294722 | 0.017164126 |
| Mill1 | 2.198026927 | 1.13620906 | 0.011197622 |
| Milr1 | 0.308245388 | -1.697848787 | 0.01853726 |
| Minpp1 | 0.651697532 | -0.617725563 | 0.009620127 |
| Mki67 | 3.498294247 | 1.806651642 | 3.48E-05 |
| Mmrn2 | 1.515210048 | 0.599517803 | 0.023436594 |
| Mob1b | 0.558382139 | -0.8406753 | 0.000146635 |
| Morn5 | 1.662175047 | 0.733072323 | 0.02623213 |
| Mpp7 | 0.606014365 | -0.722576103 | 0.016415302 |
| Mrc1 | 0.426085717 | -1.230784405 | 6.21E-09 |
| Mrgprb3 | 0.589150274 | -0.763292428 | 0.033950665 |
| Mrgprf | 1.74331795 | 0.801835715 | 0.02103818 |
| Mrgprg | 0 | #NAME? | 0.048469421 |
| Ms4a4a | 0.335916504 | -1.573825416 | 0.001268499 |
| Ms4a4c | 0.04013424 | -4.639022596 | 0.006784345 |
| Ms4a6a | 0.551680492 | -0.858095129 | 0.02982938 |
| Ms4a6b | 0.444823721 | -1.16869437 | 0.031905009 |
| Msr1 | 0.310124348 | -1.6890813 | 4.32E-08 |
| Mtbp | 2.597570728 | 1.377163032 | 0.019278888 |
| Mtr | 0.641977091 | -0.63940628 | 0.009402381 |
| Mturn | 0.640857351 | -0.641924832 | 0.003076518 |
| Mybl2 | 3.552199576 | 1.82871264 | 0.046164308 |
| Myh14 | 0.638991163 | -0.646132116 | 0.018735586 |
| Mylpf | 1.700672614 | 0.766105444 | 0.013414012 |
| Myo1f | 0.639259741 | -0.645525856 | 0.048234181 |
| Myo5a | 0.589513835 | -0.762402424 | 0.010125522 |
| Myo9a | 0.559405889 | -0.838032653 | 0.003547373 |
| Myoc | 0.608045747 | -0.717748224 | 0.00986816 |
| Napsa | 0.533752826 | -0.905756293 | 0.039708966 |
| Nckap1l | 0.463767117 | -1.108527563 | 0.000537945 |
| Ncoa2 | 0.649387442 | -0.62284861 | 0.04908877 |
| Ncs1 | 0.523771438 | -0.932990704 | 0.032895385 |
| Nedd4l | 0.656534644 | -0.607056955 | 0.005467949 |
| Nek2 | Inf | Inf | 0.002112976 |
| Nes | 1.955093636 | 0.967237705 | 0.0206808 |
| Nfia | 0.662727436 | -0.593512449 | 0.015732782 |
| Nlrp3 | 0.226466131 | -2.142632787 | 0.002239354 |
| Nmi | 0.595822964 | -0.747044366 | 0.043384825 |
| Nos1 | 0.349590042 | -1.516264004 | 3.49E-07 |
| Notch4 | 2.035157213 | 1.025140245 | 0.000481256 |
| Nova2 | 2.278513118 | 1.188092676 | 0.00447557 |
| Nox4 | 0.46216533 | -1.113519056 | 0.004535981 |
| Npr3 | 0.663352325 | -0.592152765 | 0.047462963 |
| Npy1r | 1.690743473 | 0.757657784 | 0.014926619 |
| Nr2c2 | 0.540417148 | -0.88785464 | 0.000768953 |
| Nrip2 | 2.680679988 | 1.422599005 | 0.025878034 |
| Nt5dc3 | 0.592192315 | -0.755862326 | 0.007872395 |
| Ntrk2 | 0.532586156 | -0.908913168 | 0.001134881 |
| Nudt8 | 1.545020053 | 0.627625563 | 0.014350705 |
| Nusap1 | 3.887180679 | 1.958724167 | 0.000159974 |
| Ogfod1 | 0.496791338 | -1.009288075 | 9.35E-05 |
| Ormdl1 | 2.410613284 | 1.269400229 | 0.030153688 |
| P2ry12 | 0.434585654 | -1.202287546 | 0.019473585 |
| P3h2 | 1.927896198 | 0.947027376 | 0.003640826 |
| Padi2 | 0.620733546 | -0.687953981 | 0.002254794 |
| Palm2 | 0.511775387 | -0.966417329 | 0.026804643 |
| Papln | 1.998938055 | 0.999233765 | 0.000411169 |
| Paqr6 | 1.500572341 | 0.585512871 | 0.045352227 |
| Parvg | 0.337454634 | -1.567234531 | 0.012596239 |
| Pbk | 6.872835254 | 2.780905378 | 0.00153337 |
| Pcsk1 | 0.199193192 | -2.327759752 | 0.002748656 |
| Pcyox1l | 2.47795843 | 1.309151985 | 0.001512558 |
| Pdcd1lg2 | 2.072285008 | 1.051222435 | 0.04327869 |
| Pde10a | 0.434681469 | -1.201969502 | 0.031456707 |
| Pde3b | 0.629489618 | -0.667745512 | 0.031860297 |
| Pdgfra | 0.637877139 | -0.648649521 | 0.001416205 |
| Pdpr | 0.563804236 | -0.826733778 | 0.008778128 |
| Pecam1 | 1.623906994 | 0.699469007 | 0.002444569 |
| Pex5 | 0.559430693 | -0.837968686 | 0.005516999 |
| Phactr3 | 6.202767926 | 2.632912148 | 0.047509684 |
| Phf24 | 0.577436553 | -0.792265658 | 0.035099783 |
| Pik3ip1 | 1.598387446 | 0.676617157 | 0.02772466 |
| Pik3r5 | 0.38410422 | -1.380430281 | 0.020280225 |
| Pitx1 | 0.117524378 | -3.088968053 | 0.033965939 |
| Plcb1 | 1.808558533 | 0.854840291 | 0.008247886 |
| Plek | 0.569770775 | -0.811546471 | 0.01210468 |
| Plk1 | 6.426595665 | 2.684054707 | 0.001563459 |
| Plk4 | 3.602911689 | 1.84916329 | 0.025260067 |
| Plppr4 | 14.60080428 | 3.867975937 | 0.035816417 |
| Pltp | 0.608091128 | -0.717640555 | 0.000445447 |
| Pmepa1 | 0.525049761 | -0.929473936 | 0.015976713 |
| Pmf1 | 1.852021106 | 0.88910054 | 0.031943931 |
| Ppcdc | 2.852455951 | 1.512204608 | 0.049418534 |
| Ppp1r14b | 1.631969386 | 0.706613994 | 0.011532249 |
| Ppp1r3e | 0.265237705 | -1.914642218 | 0.047687967 |
| Pptc7 | 0.589037984 | -0.763567425 | 0.000950351 |
| Pragmin | 1.603369208 | 0.681106674 | 0.042985892 |
| Prc1 | 3.317874344 | 1.730259249 | 0.001289479 |
| Prcd | 1.999567531 | 0.999688005 | 3.45E-06 |
| Prkcb | 0.398925982 | -1.325807007 | 0.004105403 |
| Prkce | 0.594728298 | -0.749697373 | 0.006991763 |
| Prkg2 | 0.456943138 | -1.129913447 | 0.000505208 |
| Prnd | 6.958402278 | 2.798756086 | 0.004525539 |
| Prok2 | 0 | #NAME? | 0.014220865 |
| Prrg2 | 1.748611679 | 0.80620994 | 0.04098013 |
| Prrx1 | 0.596060945 | -0.746468247 | 0.049807278 |
| Psat1 | 1.867994341 | 0.901490084 | 0.045435452 |
| Psmb8 | 1.677129559 | 0.745994142 | 0.024953458 |
| Psmb9 | 1.677517338 | 0.746327678 | 0.007527016 |
| Ptar1 | 0.634397491 | -0.65654103 | 0.020268272 |
| Pter | 2.291661363 | 1.196393874 | 0.002985386 |
| Ptpn4 | 0.662733919 | -0.593498335 | 0.00216071 |
| Ptpn6 | 0.61329474 | -0.705347518 | 0.016337786 |
| Ptprc | 0.471795431 | -1.083766646 | 3.35E-05 |
| Ptprj | 0.652301897 | -0.61638827 | 0.010789913 |
| Ptpro | 0.39987145 | -1.322391817 | 0.000919458 |
| Pttg1 | 5.292296643 | 2.40389393 | 0.017905997 |
| Pygo1 | 0.590619276 | -0.759699653 | 0.031738208 |
| Qk | 0.628592597 | -0.669802812 | 0.016554905 |
| Qpctl | 1.766954955 | 0.821265261 | 0.011506262 |
| RGD1305184 | 6.183623383 | 2.628452454 | 0.009582665 |
| RGD1305645 | 0.398086785 | -1.328845114 | 0.005675948 |
| RGD1305704 | 0.597055751 | -0.744062444 | 0.003315835 |
| RGD1310429 | 0.617890946 | -0.694575861 | 0.017551061 |
| RGD1559575 | 0.471817594 | -1.083698879 | 0.002783863 |
| RGD1559731 | 1.874855751 | 0.906779601 | 0.009226847 |
| RGD1560775 | 2.341927281 | 1.22769628 | 0.01560674 |
| RGD1563941 | 1.563825823 | 0.645079836 | 0.045555118 |
| RGD1564400 | 0.463385255 | -1.109715957 | 0.04163649 |
| RT1-Ba | 0.468958609 | -1.092467502 | 2.92E-05 |
| RT1-CE3 | 2.298130933 | 1.200460996 | 9.96E-05 |
| RT1-Da | 0.557253945 | -0.843593171 | 1.85E-05 |
| RT1-N2 | 2.35551865 | 1.236044755 | 0.015970327 |
| RT1-N3 | 2.0212434 | 1.015243063 | 0.001014518 |
| RT1-T24-1 | 2.22512422 | 1.153885878 | 0.010695132 |
| RT1-T24-3 | 2.287406021 | 1.193712471 | 1.82E-06 |
| Rabep2 | 1.656629472 | 0.72825096 | 0.021423843 |
| Rac2 | 0.516873968 | -0.952115552 | 0.000417009 |
| Rai14 | 1.718573374 | 0.781211449 | 0.000839693 |
| Ralgapa2 | 0.559724074 | -0.837212295 | 0.039955946 |
| Ramp2 | 1.539038839 | 0.62202964 | 0.00185099 |
| Rarres1 | 0.650476121 | -0.620431998 | 0.041181124 |
| Rasd1 | 1.825336812 | 0.868162695 | 0.008326956 |
| Rasgrp1 | 0.148601265 | -2.750481695 | 0.000352175 |
| Reck | 0.575458328 | -0.797216635 | 0.000265598 |
| Retnlg | 0.130035008 | -2.943028017 | 0.029982129 |
| Rfesd | 0.662501037 | -0.594005382 | 0.004251743 |
| Rgs16 | 1.620739895 | 0.696652578 | 0.004550629 |
| Rgs18 | 0.476091014 | -1.070690697 | 0.011231458 |
| Rgs5 | 0.620283854 | -0.688999522 | 0.009378921 |
| Rhou | 0.663039582 | -0.592833096 | 0.002478759 |
| Rnaseh2c | 1.70256167 | 0.767707056 | 0.045426312 |
| Rock2 | 0.648770261 | -0.624220406 | 0.000477816 |
| Rpl10l | 0.253279592 | -1.981197259 | 0.00918116 |
| Rps6ka5 | 0.634046859 | -0.657338628 | 0.001583186 |
| Rrm2 | 4.302124505 | 2.105049277 | 0.022008139 |
| Rrm2b | 0.600058892 | -0.736823995 | 0.004232751 |
| Rspo3 | 1.712316904 | 0.775949731 | 0.013322354 |
| Rxra | 0.627882816 | -0.671432766 | 0.009603837 |
| Ryr3 | 0.626719459 | -0.674108307 | 0.012578985 |
| Samd9l | 1.664131166 | 0.73476915 | 0.002667545 |
| Samsn1 | 0.389014445 | -1.362104367 | 0.013575719 |
| Sapcd2 | 5.431465718 | 2.441341572 | 0.038797844 |
| Sash3 | 0.437775244 | -1.191737722 | 0.025629941 |
| Sbk1 | 0.519562267 | -0.944631434 | 0.031175376 |
| Sbno1 | 0.653323884 | -0.614129713 | 0.001127123 |
| Scarb2 | 0.610402045 | -0.7121683 | 0.000603123 |
| Sccpdh | 9.112063472 | 3.187777797 | 1.81E-11 |
| Scd2 | 1.771708482 | 0.825141242 | 0.00398373 |
| Sec14l4 | 0.414292992 | -1.271276678 | 0.003427252 |
| Secisbp2l | 0.612081678 | -0.708203911 | 0.000480036 |
| Selp | 0.421870479 | -1.245127959 | 0.004304258 |
| Selplg | 0.422719582 | -1.242227151 | 0.007797049 |
| Sema6b | 1.534034423 | 0.617330857 | 0.038482934 |
| Serhl2 | 1.584146133 | 0.663705426 | 0.005628986 |
| Serpina3n | 3.496515759 | 1.805918007 | 0.028061904 |
| Serpinb10 | 0.208410188 | -2.262502292 | 0.00263888 |
| Setbp1 | 0.624902853 | -0.678296167 | 0.042563541 |
| Setd7 | 0.537318734 | -0.896149955 | 0.001365763 |
| Sez6l2 | 3.784649038 | 1.920159521 | 0.012678308 |
| Sfrp1 | 0.483468517 | -1.04850615 | 0.002536325 |
| Sgk1 | 1.657492824 | 0.729002624 | 0.021997677 |
| Sgms1 | 0.644192432 | -0.634436382 | 0.001167324 |
| Sgpp2 | 3.468500051 | 1.794311906 | 0.007028201 |
| Sh2d3c | 1.774268193 | 0.827224099 | 0.008246446 |
| Shroom2 | 1.670223122 | 0.740040843 | 0.023256549 |
| Siglec1 | 0.515136023 | -0.956974664 | 0.014857965 |
| Siglec10 | 0.228031153 | -2.13269716 | 0.016116871 |
| Siglec5 | 0.24243993 | -2.044300761 | 0.001642062 |
| Ska1 | 13.20939867 | 3.723492887 | 0.045370852 |
| Ska3 | 3.294243416 | 1.719947162 | 0.003739861 |
| Sla | 0.392344926 | -1.349805553 | 0.003111541 |
| Slc15a2 | 0.473078532 | -1.0798484 | 0.01825864 |
| Slc16a7 | 0.45158451 | -1.146932093 | 0.000861311 |
| Slc25a1 | 1.871970377 | 0.904557605 | 0.014207448 |
| Slc25a34 | 0.541504308 | -0.884955279 | 4.29E-05 |
| Slc26a2 | 0.628603178 | -0.669778529 | 0.022153912 |
| Slc35f1 | 2.035728993 | 1.025545515 | 0.032911669 |
| Slc36a1 | 0.468252386 | -1.09464175 | 0.004324718 |
| Slc38a1 | 0.57192825 | -0.806093926 | 0.020738362 |
| Slc4a7 | 0.583962624 | -0.776052061 | 0.007055175 |
| Slc7a4 | 1.950469524 | 0.963821457 | 0.036034855 |
| Slc9a7 | 0.58495479 | -0.773602969 | 0.03638252 |
| Slc9a9 | 0.599493102 | -0.738184941 | 0.042766637 |
| Slpi | 0.236700493 | -2.078865386 | 3.53E-12 |
| Slx4ip | 2.375929735 | 1.248492171 | 0.022258764 |
| Smcr8 | 0.46803836 | -1.095301319 | 0.000212816 |
| Socs4 | 0.537212571 | -0.896435031 | 0.003611549 |
| Sorbs2 | 1.583608867 | 0.663216051 | 0.044748787 |
| Sox6 | 0.582117064 | -0.780618786 | 0.001296441 |
| Sox8 | 4.46672699 | 2.159218079 | 0.000857448 |
| Spata13 | 1.615060703 | 0.69158839 | 0.00385104 |
| Spcs3 | 0.603779108 | -0.727907258 | 0.001427073 |
| Sphk1 | 2.010198244 | 1.007337786 | 0.038237027 |
| Ss18l1 | 0.42495211 | -1.234627829 | 0.004053109 |
| Stk17b | 0.666497564 | -0.585328491 | 0.008528979 |
| Stmn1 | 1.649147656 | 0.721720576 | 0.007518197 |
| Ston2 | 0.342049372 | -1.547723512 | 0.000312715 |
| Stx7 | 0.618286003 | -0.693653748 | 0.045871892 |
| Sumf2 | 1.766322681 | 0.820748926 | 0.003339107 |
| Susd2 | 1.648312398 | 0.720989697 | 0.000870823 |
| Syk | 0.570126677 | -0.810645587 | 0.031468712 |
| Tacc3 | 2.017562932 | 1.012613675 | 0.018555374 |
| Tagap | 0.45095079 | -1.148958088 | 0.010148097 |
| Taok1 | 0.594420202 | -0.750444948 | 0.001068262 |
| Tap1 | 2.17929153 | 1.123859203 | 0.000212707 |
| Tbc1d12 | 0.404716355 | -1.305016944 | 0.047603248 |
| Tbc1d24 | 0.620811473 | -0.687772876 | 0.005870012 |
| Tbkbp1 | 1.501539416 | 0.586442347 | 0.019524519 |
| Tbx2 | 1.533321686 | 0.616660402 | 0.016518867 |
| Tbxas1 | 0.500961516 | -0.997228315 | 0.024738465 |
| Tceal3 | 5.740832973 | 2.521260082 | 0.038688544 |
| Tceal7 | 1.704543782 | 0.769385656 | 0.005966708 |
| Tceb2 | 1.503566403 | 0.588388584 | 0.008208292 |
| Tcf19 | 3.292525166 | 1.719194467 | 0.00057297 |
| Tcp11l1 | 0.462044903 | -1.113895032 | 0.031262173 |
| Tecrl | 0.591541853 | -0.757447848 | 0.018365227 |
| Tenm2 | 2.745310611 | 1.456969388 | 0.010872852 |
| Thbs4 | 0.346208006 | -1.530289009 | 0.000150233 |
| Thumpd2 | 1.559447904 | 0.641035358 | 0.048788429 |
| Tiam1 | 0.542215347 | -0.883062147 | 0.035726391 |
| Tie1 | 1.581450722 | 0.661248602 | 0.008294724 |
| Tlr7 | 0.429227913 | -1.220184196 | 0.001507515 |
| Tlr8 | 0.319465054 | -1.64626997 | 0.000946693 |
| Tmc7 | 0.515517304 | -0.955907242 | 0.000172082 |
| Tmco3 | 0.0413987 | -4.594270736 | 0.007386853 |
| Tmem167b | 0.657509552 | -0.604916241 | 0.008977046 |
| Tmem179 | 0.548849921 | -0.865516385 | 0.002185229 |
| Tmem265 | 2.2009822 | 1.138147478 | 0.008833073 |
| Tmie | 1.59110686 | 0.670030732 | 0.040926965 |
| Tmprss4 | 3.987826804 | 1.995602753 | 0.048087536 |
| Tnfaip8l1 | 1.71108192 | 0.774908832 | 0.030307433 |
| Tnmd | 0.221197888 | -2.176590484 | 0.022301378 |
| Top2a | 4.07646092 | 2.027317184 | 2.08E-08 |
| Top3a | 0.649741117 | -0.622063089 | 0.011764001 |
| Tor3a | 1.532939514 | 0.616300773 | 0.024198139 |
| Traf6 | 0.605555523 | -0.72366885 | 0.014335143 |
| Trib1 | 0.502196503 | -0.993676112 | 6.55E-05 |
| Trim30c | 0.169369067 | -2.561757687 | 0.049696828 |
| Ttc39b | 0.641968251 | -0.639426145 | 0.017283951 |
| Ttk | 11.01639993 | 3.461580935 | 0.001530773 |
| Ttn | 1.607393535 | 0.684723185 | 0.000111498 |
| Tuba4a | 1.585364585 | 0.664814654 | 0.000860216 |
| Tubb4b | 1.543918329 | 0.626596438 | 0.000299112 |
| Tulp4 | 0.616596418 | -0.697601585 | 0.000309548 |
| Uba7 | 1.636211871 | 0.710359573 | 0.013958928 |
| Ubd | 5.836634445 | 2.545136713 | 0.045571904 |
| Ube2c | 3.152561943 | 1.656524717 | 0.049233335 |
| Ube2w | 0.663874342 | -0.591017901 | 0.013503289 |
| Ubr1 | 0.662809011 | -0.593334879 | 0.01998571 |
| Ubr2 | 0.623384027 | -0.681806906 | 0.001093019 |
| Ufsp1 | 1.618415094 | 0.69458168 | 0.000884984 |
| Uhmk1 | 0.538311053 | -0.893488046 | 0.000186318 |
| Uhrf1 | 2.654584603 | 1.408486122 | 0.039988381 |
| Uprt | 0.492992611 | -1.020362072 | 0.003084834 |
| Ushbp1 | 1.739185497 | 0.798411815 | 0.028745419 |
| Usp24 | 0.650010605 | -0.621464838 | 0.014127987 |
| Usp31 | 0.628978498 | -0.668917396 | 0.019207342 |
| Vash2 | 1.579198199 | 0.659192249 | 0.017343853 |
| Vat1l | 6.402991953 | 2.678746197 | 0.033201959 |
| Vav1 | 0.431890889 | -1.211261213 | 0.031855637 |
| Vcpip1 | 0.619771556 | -0.690191551 | 0.002150098 |
| Vit | 0.395422066 | -1.338534713 | 0.048765839 |
| Wdfy4 | 0.552551205 | -0.85581993 | 0.028233792 |
| Wisp2 | 0.464248685 | -1.107030271 | 0.038532154 |
| Wnt6 | 8.041065745 | 3.007386726 | 0.043451508 |
| Xirp1 | 0.4911956 | -1.025630456 | 0.027298542 |
| Xpnpep3 | 0.618893233 | -0.692237548 | 0.003351334 |
| Xpr1 | 0.637527997 | -0.649439396 | 0.0094737 |
| Xylt1 | 0.603600254 | -0.728334682 | 0.043688953 |
| Ybey | 0.656509709 | -0.607111747 | 0.013343114 |
| Ybx2 | 1.662188676 | 0.733084153 | 0.002803564 |
| Zak | 0.555824001 | -0.847299961 | 0.003840632 |
| Zbtb20 | 0.472998427 | -1.080092708 | 0.040690699 |
| Zbtb26 | 0.660263432 | -0.598886348 | 0.047726856 |
| Zbtb33 | 0 | #NAME? | 0.048469421 |
| Zc3h12c | 0.605093277 | -0.72477054 | 0.004613838 |
| Zc4h2 | 1.725733723 | 0.787209877 | 0.024328587 |
| Zdhhc21 | 0.593354347 | -0.753034165 | 0.008000028 |
| Zfp280b | 0.509335803 | -0.973310962 | 0.001049477 |
| Zfp281 | 0.629692308 | -0.66728105 | 0.009185895 |
| Zfp398 | 0.613993264 | -0.703705266 | 0.031709497 |
| Zfp652 | 0.534691304 | -0.903221882 | 0.003425205 |
| Zfp879 | 1.63046888 | 0.705286905 | 0.04904546 |
| Zim1 | 0.400291361 | -1.320877616 | 0.001320183 |
| Znrd1as1 | 1.60823325 | 0.685476663 | 0.004901053 |
| Zswim8 | 0.571306025 | -0.807664351 | 0.034307772 |
| Zyg11b | 0.500763891 | -0.997797558 | 0.000344426 |

**Supplementary Table 6. Differentially expressed genes between CS24W and CON24W groups**

| Gene_id | Fold Change | log2FoldChange | *P* value |
| --- | --- | --- | --- |
| Abca9 | 1.668923 | 0.738917 | 0.000841 |
| Abcg3 | 0.618294 | -0.69364 | 0.044374 |
| Abhd15 | 1.970723 | 0.978725 | 0.027235 |
| Acad11 | 0.634528 | -0.65624 | 0.000933 |
| Acot2 | 0.546378 | -0.87203 | 2.81E-05 |
| Ahsg | 12.48926 | 3.642616 | 0.045266 |
| Alb | 9.735869 | 3.28331 | 0.006206 |
| Aldoc | 1.772243 | 0.825576 | 0.006243 |
| Alox5 | 1.838755 | 0.87873 | 0.009766 |
| Alx3 | Inf | Inf | 0.038303 |
| Aox1 | 0.527636 | -0.92238 | 0.006511 |
| Apold1 | 2.110015 | 1.077253 | 0.023593 |
| Arhgef26 | 0.341502 | -1.55003 | 0.021463 |
| Armc2 | 1.770771 | 0.824378 | 0.036386 |
| Armcx4 | 1.523109 | 0.607019 | 0.019883 |
| Asb5 | 0.606318 | -0.72185 | 0.027411 |
| Atp5f1 | 0.316551 | -1.65949 | 0.000605 |
| Bhlhb9 | 0.655696 | -0.6089 | 0.032177 |
| Bmp4 | 1.527545 | 0.611215 | 0.019143 |
| Bora | 2.537786 | 1.34357 | 0.019895 |
| C4bpa | Inf | Inf | 0.040174 |
| Cadm3 | 1.53777 | 0.62084 | 0.048652 |
| Calml3 | 3.303542 | 1.724014 | 0.002697 |
| Cbs | 2.141048 | 1.098317 | 0.011121 |
| Cd14 | 1.54292 | 0.625663 | 0.049899 |
| Cd163 | 1.614426 | 0.691022 | 0.034883 |
| Cd300e | 2.036972 | 1.026426 | 0.026068 |
| Cd300le | 1.981805 | 0.986815 | 0.008289 |
| Ces1d | 1.723357 | 0.785222 | 0.02492 |
| Chrna1 | 1.618422 | 0.694588 | 0.013721 |
| Col1a1 | 1.937211 | 0.953981 | 0.000858 |
| Col3a1 | 1.537312 | 0.62041 | 0.003193 |
| Crispld2 | 1.558975 | 0.640598 | 0.001408 |
| Ctsk | 1.656725 | 0.728334 | 0.010548 |
| Cxcr2 | 4.004993 | 2.0018 | 0.015478 |
| Cym | 0.094348 | -3.40586 | 0.015114 |
| Cyp1a1 | 25.85406 | 4.692319 | 2.34E-08 |
| Dand5 | 0.119401 | -3.06611 | 0.036372 |
| Dnah8 | 12.55385 | 3.650058 | 0.003025 |
| Doc2g | 1.739163 | 0.798393 | 0.020879 |
| Dusp1 | 2.041674 | 1.029753 | 1.87E-06 |
| Dusp5 | 2.263868 | 1.17879 | 0.014627 |
| Ech1 | 0.55731 | -0.84345 | 7.43E-05 |
| Eci1 | 0.577106 | -0.79309 | 0.000812 |
| Efcab6 | 0.430133 | -1.21715 | 0.010608 |
| Egr1 | 2.291768 | 1.196461 | 0.004123 |
| Egr3 | 4.115389 | 2.041029 | 7.24E-05 |
| Enc1 | 1.942635 | 0.958015 | 3.15E-06 |
| Erfe | 2.138169 | 1.096376 | 0.021932 |
| Errfi1 | 1.908126 | 0.932157 | 3.32E-07 |
| Eya2 | 1.686432 | 0.753975 | 0.011036 |
| F13a1 | 1.626012 | 0.701338 | 0.042871 |
| F3 | 1.783266 | 0.834522 | 2.47E-05 |
| Fam171a2 | 1.823689 | 0.86686 | 0.027518 |
| Fbp2 | 0.578278 | -0.79016 | 0.031953 |
| Fgf10 | 9.385111 | 3.230374 | 0.035058 |
| Fkbp5 | 2.655043 | 1.408735 | 2.84E-13 |
| Fmo1 | 1.558082 | 0.639771 | 0.005623 |
| Gem | 1.867527 | 0.901129 | 0.002508 |
| Ghdc | 2.152509 | 1.106019 | 0.026424 |
| Gpr153 | 1.956977 | 0.968627 | 0.035609 |
| Gpr88 | 0.552572 | -0.85577 | 0.007947 |
| Gpsm1 | 1.548426 | 0.630802 | 0.027921 |
| Gstm3 | 0.651292 | -0.61862 | 0.01132 |
| H1fx | 1.713137 | 0.776641 | 0.035656 |
| Heyl | 1.568042 | 0.648964 | 0.020941 |
| Hmcn2 | 1.520495 | 0.604541 | 0.012494 |
| Hmgcs2 | 0.244268 | -2.03346 | 0.000214 |
| Hoxa1 | 0.223561 | -2.16126 | 0.046512 |
| Igfbp2 | 0.464122 | -1.10742 | 0.002926 |
| Igfn1 | 0.096471 | -3.37376 | 0.034036 |
| Ino80b | 39.5862 | 5.306926 | 0.003879 |
| Kcne2 | 0.427885 | -1.2247 | 0.048219 |
| Klf4 | 1.633879 | 0.708301 | 0.001745 |
| LOC100909784 | 5.049499 | 2.33614 | 0.02326 |
| LOC100910207 | 0.035905 | -4.79966 | 0.008351 |
| LOC100910418 | 4.08608 | 2.030718 | 0.018248 |
| LOC100910575 | 42.0889 | 5.395368 | 0.003346 |
| LOC100911260 | 0.035036 | -4.835 | 1.15E-11 |
| LOC100911453 | Inf | Inf | 0.018859 |
| LOC100911672 | 4.114123 | 2.040585 | 0.042317 |
| LOC100911769 | 2.40423 | 1.265575 | 0.016153 |
| LOC100911959 | 4.196396 | 2.069151 | 0.018427 |
| LOC100912573 | Inf | Inf | 0.006837 |
| LOC103689985 | 17.87944 | 4.160229 | 0.030157 |
| LOC103690033 | 0.010497 | -6.57382 | 0.000234 |
| LOC108348074 | 2.279728 | 1.188861 | 0.015182 |
| LOC108349479 | 0.17748 | -2.49427 | 0.047401 |
| LOC108352650 | 2.04213 | 1.030075 | 0.027993 |
| LOC685849 | Inf | Inf | 0.021256 |
| Lrrc66 | 2.045844 | 1.032696 | 0.045494 |
| Lrrc8e | 0.209952 | -2.25187 | 0.042876 |
| Lum | 1.622951 | 0.69862 | 0.003399 |
| Mafa | 0.661359 | -0.59649 | 0.002067 |
| Maff | 1.526035 | 0.609788 | 0.027953 |
| Mamdc2 | 1.827552 | 0.869912 | 0.030428 |
| Mast4 | 11.58563 | 3.534264 | 0.045223 |
| Mettl21cl1 | 4.886616 | 2.288836 | 0.001521 |
| Mfsd14a | 0.33786 | -1.5655 | 0.031809 |
| Mllt3 | 0.586105 | -0.77077 | 0.010573 |
| Mmp2 | 1.851952 | 0.889046 | 0.009996 |
| Ms4a6b | 2.274143 | 1.185323 | 0.023915 |
| Msra | 2.212415 | 1.145622 | 0.010515 |
| Myh4 | 0.081077 | -3.62457 | 0.042856 |
| Myh8 | 1.840527 | 0.880119 | 0.012597 |
| Nfatc4 | 1.683759 | 0.751685 | 0.029312 |
| Nhsl1 | 1.512861 | 0.59728 | 0.038836 |
| Nid1 | 1.621662 | 0.697474 | 0.004335 |
| Npr3 | 2.020601 | 1.014785 | 0.029134 |
| Nptx1 | 2.830599 | 1.501107 | 0.032101 |
| Nt5c3b | 0.646204 | -0.62994 | 0.034681 |
| Paqr8 | 0.634216 | -0.65695 | 0.04598 |
| Pdgfrl | 1.960657 | 0.971337 | 0.008269 |
| Penk | 2.811949 | 1.49157 | 0.030907 |
| Pi16 | 1.625355 | 0.700755 | 0.000641 |
| Plekhb1 | 0.623739 | -0.68098 | 0.003129 |
| Plk3 | 2.171683 | 1.118814 | 0.007589 |
| Pnpla2 | 0.094764 | -3.39952 | 2.77E-05 |
| Pnpla3 | 2.32845 | 1.21937 | 0.022091 |
| Polr3gl | 0.634778 | -0.65568 | 0.00629 |
| Ppfia4 | 0.658321 | -0.60314 | 0.032223 |
| Ptgs2 | 5.563447 | 2.475979 | 0.014418 |
| Pzp | Inf | Inf | 0.022736 |
| RGD1311575 | 0.149681 | -2.74004 | 0.008647 |
| RGD1561730 | 0 | #NAME? | 0.041232 |
| RGD1561778 | 2.622665 | 1.391034 | 0.016581 |
| RT1-T24-3 | 1.573032 | 0.653548 | 0.037871 |
| Rec114 | 0.187434 | -2.41554 | 0.00048 |
| Rfx1 | 1.578655 | 0.658696 | 0.043925 |
| Rgs16 | 0.587999 | -0.76611 | 0.034553 |
| Scarf1 | 1.563526 | 0.644803 | 0.019443 |
| Sdc4 | 1.567032 | 0.648034 | 0.015451 |
| Shox2 | 0.589861 | -0.76155 | 0.001542 |
| Sik1 | 2.225708 | 1.154264 | 9.66E-07 |
| Slc17a9 | 0.295117 | -1.76064 | 0.041326 |
| Slc30a3 | 1.77356 | 0.826648 | 0.001612 |
| Slc43a3 | 1.513055 | 0.597465 | 0.025762 |
| Slitrk2 | 0.239179 | -2.06384 | 0.027976 |
| Spag1 | 1.687642 | 0.755009 | 0.048251 |
| Stc1 | 2.343261 | 1.228518 | 0.031868 |
| Sumo4 | 0.648185 | -0.62552 | 0.038203 |
| Tagap | 1.679239 | 0.747807 | 0.038329 |
| Tecta | 0 | #NAME? | 0.044035 |
| Thbs3 | 1.644268 | 0.717445 | 0.023828 |
| Tmem104 | 1.578383 | 0.658447 | 0.016691 |
| Tmem108 | 1.63646 | 0.710578 | 0.035577 |
| Tmem132e | 2.372816 | 1.2466 | 0.017301 |
| Tmem71 | 0.521172 | -0.94017 | 0.043742 |
| Tnnt2 | 4.224732 | 2.07886 | 8.01E-09 |
| Tp53i3 | 0.549894 | -0.86278 | 0.010787 |
| Tpsab1 | 2.009101 | 1.00655 | 0.013799 |
| Tpsb2 | 1.881533 | 0.911909 | 0.04329 |
| Tspan10 | 0.069123 | -3.85469 | 0.001876 |
| Ttll10 | 0 | #NAME? | 0.04575 |
| Tubb6 | 1.592764 | 0.671532 | 0.020769 |
| Wbp1 | 35.12197 | 5.134302 | 0.001381 |
| Wbp11 | 0.141811 | -2.81796 | 0.041873 |
| Wdr31 | 0.49261 | -1.02148 | 0.013965 |
| Zfp703 | 1.660127 | 0.731294 | 0.02954 |
| Zfp952 | 0.641498 | -0.64048 | 0.027557 |
| Zfp955a | 0.577238 | -0.79276 | 0.003161 |
| Zim1 | 1.61391 | 0.69056 | 0.038456 |

**Supplementary Table 7. Pathways of enrichment analysis KEGG differential genes in CS12W group**

| id | Term | ListHits | *P* value | Enrichment score |
| --- | --- | --- | --- | --- |
| rno04145 | Phagosome | 26 | 1.52E-10 | 4.07 |
| rno04514 | Cell adhesion molecules (CAMs) | 21 | 6.94E-08 | 3.60 |
| rno05150 | Staphylococcus aureus infection | 10 | 7.72E-07 | 5.79 |
| rno04022 | cGMP - PKG signaling pathway | 18 | 3.36E-06 | 3.18 |
| rno04110 | Cell cycle | 15 | 5.03E-06 | 3.50 |
| rno04670 | Leukocyte transendothelial migration | 14 | 7.02E-06 | 3.59 |
| rno04810 | Regulation of actin cytoskeleton | 20 | 9.26E-06 | 2.78 |
| rno04510 | Focal adhesion | 19 | 1.40E-05 | 2.79 |
| rno04151 | PI3K-Akt signaling pathway | 27 | 1.40E-05 | 2.31 |
| rno04666 | Fc gamma R-mediated phagocytosis | 11 | 3.55E-05 | 3.70 |
| rno04960 | Aldosterone-regulated sodium reabsorption | 7 | 3.64E-05 | 5.33 |
| rno05416 | Viral myocarditis | 11 | 4.48E-05 | 3.62 |
| rno04970 | Salivary secretion | 10 | 6.03E-05 | 3.76 |
| rno05140 | Leishmaniasis | 9 | 8.94E-05 | 3.89 |
| rno04062 | Chemokine signaling pathway | 16 | 9.40E-05 | 2.68 |
| rno04610 | Complement and coagulation cascades | 10 | 9.67E-05 | 3.57 |
| rno04662 | B cell receptor signaling pathway | 9 | 0.000147 | 3.67 |
| rno04218 | Cellular senescence | 16 | 0.000214 | 2.50 |
| rno04071 | Sphingolipid signaling pathway | 12 | 0.000222 | 2.92 |
| rno05168 | Herpes simplex infection | 17 | 0.000233 | 2.41 |
| rno04640 | Hematopoietic cell lineage | 10 | 0.000278 | 3.18 |
| rno05166 | HTLV-I infection | 21 | 0.000301 | 2.15 |
| rno04612 | Antigen processing and presentation | 10 | 0.000337 | 3.11 |
| rno05332 | Graft-versus-host disease | 8 | 0.00036 | 3.56 |
| rno04913 | Ovarian Steroidogenesis | 7 | 0.00042 | 3.82 |
| rno05200 | Pathways in cancer | 32 | 0.000422 | 1.79 |
| rno05203 | Viral carcinogenesis | 17 | 0.000443 | 2.29 |
| rno05330 | Allograft rejection | 8 | 0.000507 | 3.41 |
| rno04512 | ECM-receptor interaction | 9 | 0.000539 | 3.14 |
| rno04940 | Type I diabetes mellitus | 8 | 0.000949 | 3.13 |
| rno05152 | Tuberculosis | 14 | 0.000977 | 2.33 |
| rno05320 | Autoimmune thyroid disease | 8 | 0.001047 | 3.09 |
| rno05222 | Small cell lung cancer | 9 | 0.001118 | 2.86 |
| rno04611 | Platelet activation | 11 | 0.001235 | 2.55 |
| rno04713 | Circadian entrainment | 9 | 0.001686 | 2.71 |
| rno05340 | Primary immunodeficiency | 5 | 0.001751 | 3.81 |
| rno05146 | Amoebiasis | 9 | 0.001824 | 2.69 |
| rno04115 | p53 signaling pathway | 7 | 0.00185 | 3.07 |
| rno04068 | FoxO signaling pathway | 11 | 0.001976 | 2.41 |
| rno04371 | Apelin signaling pathway | 11 | 0.002244 | 2.38 |
| rno04923 | Regulation of lipolysis in adipocyte | 6 | 0.002669 | 3.16 |
| rno04540 | Gap junction | 8 | 0.002756 | 2.69 |
| rno04650 | Natural killer cell mediated cytotoxicity | 11 | 0.00287 | 2.31 |
| rno04976 | Bile secretion | 7 | 0.002954 | 2.85 |
| rno04914 | Progesterone-mediated oocyte maturation | 8 | 0.003225 | 2.63 |
| rno00072 | Synthesis and degradation of ketone bodies | 2 | 0.004086 | 5.79 |
| rno04672 | Intestinal immune network for IgA production | 5 | 0.004222 | 3.22 |
| rno04060 | Cytokine-cytokine receptor interaction | 16 | 0.004394 | 1.91 |
| rno01522 | Endocrine resistance | 8 | 0.004675 | 2.49 |
| rno05167 | Kaposi's sarcoma-associated herpesvirus infection | 14 | 0.005059 | 1.97 |
| rno04015 | Rap1 signaling pathway | 14 | 0.005289 | 1.96 |
| rno03030 | DNA replication | 4 | 0.005805 | 3.41 |
| rno04925 | Aldosterone synthesis and secretion | 8 | 0.006166 | 2.39 |
| rno03320 | PPAR signaling pathway | 7 | 0.006168 | 2.53 |
| rno05165 | Human papillomavirus infection | 20 | 0.00717 | 1.70 |
| rno04664 | Fc epsilon RI signaling pathway | 6 | 0.007428 | 2.63 |
| rno05223 | Non-small cell lung cancer | 6 | 0.007428 | 2.63 |
| rno04933 | AGE-RAGE signaling pathway in diabetic complications | 8 | 0.007505 | 2.32 |
| rno04934 | Cushing's syndrome | 11 | 0.007662 | 2.04 |
| rno04911 | Insulin secretion | 7 | 0.008836 | 2.38 |
| rno04961 | Endocrine and other factor-regulated calcium reabsorption | 5 | 0.009462 | 2.73 |
| rno04152 | AMPK signaling pathway | 9 | 0.009954 | 2.12 |
| rno05144 | Malaria | 5 | 0.011285 | 2.63 |
| rno04974 | Protein digestion and absorption | 7 | 0.011528 | 2.28 |
| rno05219 | Bladder cancer | 4 | 0.011608 | 2.89 |
| rno04918 | Thyroid hormone synthesis | 6 | 0.011802 | 2.41 |
| rno05145 | Toxoplasmosis | 8 | 0.012874 | 2.12 |
| rno05310 | Asthma | 3 | 0.013069 | 3.22 |
| rno04270 | Vascular smooth muscle contraction | 9 | 0.014336 | 2.00 |
| rno04114 | Oocyte meiosis | 8 | 0.01518 | 2.07 |
| rno04622 | RIG-I-like receptor signaling pathway | 5 | 0.016902 | 2.41 |
| rno04730 | Long-term depression | 5 | 0.016902 | 2.41 |
| rno00480 | Glutathione metabolism | 5 | 0.018221 | 2.37 |
| rno05169 | Epstein-Barr virus infection | 13 | 0.019371 | 1.72 |
| rno04919 | Thyroid hormone signaling pathway | 8 | 0.019679 | 1.98 |
| rno04972 | Pancreatic secretion | 7 | 0.020845 | 2.05 |
| rno04213 | Longevity regulating pathway - multiple species | 5 | 0.021066 | 2.30 |
| rno02010 | ABC transporters | 4 | 0.02228 | 2.46 |
| rno05164 | Influenza A | 10 | 0.023498 | 1.80 |
| rno04010 | MAPK signaling pathway | 16 | 0.023616 | 1.59 |
| rno04930 | Type II diabetes mellitus | 4 | 0.024192 | 2.41 |
| rno04927 | Cortisol synthesis and secretion | 5 | 0.024199 | 2.23 |
| rno05323 | Rheumatoid arthritis | 6 | 0.025653 | 2.07 |
| rno00600 | Sphingolipid metabolism | 4 | 0.026206 | 2.36 |
| rno00770 | Pantothenate and CoA biosynthesis | 2 | 0.026234 | 3.05 |
| rno00220 | Arginine biosynthesis | 2 | 0.026234 | 3.05 |
| rno04979 | Cholesterol metabolism | 4 | 0.028325 | 2.32 |
| rno04310 | Wnt signaling pathway | 9 | 0.028375 | 1.80 |
| rno00740 | Riboflavin metabolism | 1 | 0.029015 | 3.62 |
| rno00980 | Metabolism of xenobiotics by cytochrome P450 | 5 | 0.029458 | 2.13 |
| rno04072 | Phospholipase D signaling pathway | 9 | 0.030801 | 1.77 |
| rno04931 | Insulin resistance | 7 | 0.032969 | 1.88 |
| rno05214 | Glioma | 5 | 0.035418 | 2.04 |
| rno05162 | Measles | 8 | 0.035768 | 1.78 |
| rno04024 | cAMP signaling pathway | 11 | 0.036294 | 1.64 |
| rno04064 | NF-kappa B signaling pathway | 6 | 0.037494 | 1.91 |
| rno04620 | Toll-like receptor signaling pathway | 6 | 0.037494 | 1.91 |
| rno04630 | Jak-STAT signaling pathway | 9 | 0.0375 | 1.71 |
| rno05216 | Thyroid cancer | 3 | 0.037646 | 2.35 |
| rno04964 | Proximal tubule bicarbonate reclamation | 2 | 0.038657 | 2.63 |
| rno05161 | Hepatitis B | 8 | 0.042143 | 1.73 |
| rno00340 | Histidine metabolism | 2 | 0.043354 | 2.52 |
| rno00750 | Vitamin B6 metabolism | 1 | 0.044561 | 2.89 |
| rno04370 | VEGF signaling pathway | 4 | 0.046177 | 2.03 |
| rno05322 | Systemic lupus erythematosus | 6 | 0.047856 | 1.81 |
| rno04973 | Carbohydrate digestion and absorption | 3 | 0.048112 | 2.17 |
| rno00590 | Arachidonic acid metabolism | 5 | 0.049536 | 1.88 |
| rno04144 | Endocytosis | 14 | 0.050814 | 1.48 |
| rno00430 | Taurine and hypotaurine metabolism | 1 | 0.053247 | 2.63 |
| rno04020 | Calcium signaling pathway | 10 | 0.053738 | 1.57 |
| rno00650 | Butanoate metabolism | 2 | 0.05905 | 2.23 |
| rno04261 | Adrenergic signaling in cardiomyocytes | 8 | 0.05918 | 1.62 |
| rno04530 | Tight junction | 9 | 0.05947 | 1.58 |
| rno05160 | Hepatitis C | 7 | 0.062471 | 1.65 |
| rno04660 | T cell receptor signaling pathway | 6 | 0.062498 | 1.70 |
| rno05224 | Breast cancer | 8 | 0.065719 | 1.59 |
| rno04142 | Lysosome | 7 | 0.067351 | 1.62 |
| rno00512 | Mucin type O-glycan biosynthesis | 2 | 0.070792 | 2.07 |
| rno00061 | Fatty acid biosynthesis | 1 | 0.072192 | 2.23 |
| rno05202 | Transcriptional misregulation in cancers | 9 | 0.074203 | 1.51 |
| rno05221 | Acute myeloid leukemia | 4 | 0.077121 | 1.75 |
| rno05225 | Hepatocellular carcinoma | 9 | 0.078798 | 1.50 |
| rno04921 | Oxytocin signaling pathway | 8 | 0.080121 | 1.52 |
| rno05206 | MicroRNAs in cancer | 13 | 0.080383 | 1.40 |
| rno00410 | beta-Alanine metabolism | 2 | 0.083493 | 1.93 |
| rno04211 | Longevity regulating pathway - mammal | 5 | 0.086894 | 1.63 |
| rno05414 | Dilated cardiomyopathy (DCM) | 5 | 0.086894 | 1.63 |
| rno05204 | Chemical carcinogenesis | 5 | 0.086894 | 1.63 |
| rno00330 | Arginine and proline metabolism | 3 | 0.08806 | 1.77 |
| rno05205 | Proteoglycans in cancer | 10 | 0.088177 | 1.44 |
| rno04750 | Inflammatory mediator regulation of TRP channels | 6 | 0.089081 | 1.56 |
| rno00640 | Propanoate metabolism | 2 | 0.090183 | 1.87 |
| rno04658 | Th1 and Th2 cell differentiation | 5 | 0.090556 | 1.61 |
| rno04120 | Ubiquitin mediated proteolysis | 7 | 0.092157 | 1.51 |
| rno00730 | Thiamine metabolism | 1 | 0.092933 | 1.93 |
| rno04920 | Adipocytokine signaling pathway | 4 | 0.098148 | 1.63 |
| rno04520 | Adherens junction | 4 | 0.098148 | 1.63 |
| rno04014 | Ras signaling pathway | 11 | 0.101087 | 1.38 |
| rno04917 | Prolactin signaling pathway | 4 | 0.10267 | 1.61 |
| rno05218 | Melanoma | 4 | 0.10267 | 1.61 |
| rno05133 | Pertussis | 4 | 0.10267 | 1.61 |
| rno00120 | Primary bile acid biosynthesis | 1 | 0.103872 | 1.81 |
| rno04623 | Cytosolic DNA-sensing pathway | 3 | 0.104067 | 1.67 |
| rno05020 | Prion diseases | 2 | 0.111518 | 1.70 |
| rno04971 | Gastric acid secretion | 4 | 0.112017 | 1.56 |
| rno05212 | Pancreatic cancer | 4 | 0.112017 | 1.56 |
| rno05215 | Prostate cancer | 5 | 0.11425 | 1.51 |
| rno00240 | Pyrimidine metabolism | 5 | 0.11425 | 1.51 |
| rno00910 | Nitrogen metabolism | 1 | 0.115139 | 1.70 |
| rno00450 | Selenocompound metabolism | 1 | 0.115139 | 1.70 |
| rno05143 | African trypanosomiasis | 2 | 0.119023 | 1.65 |
| rno04722 | Neurotrophin signaling pathway | 6 | 0.121142 | 1.45 |
| rno00670 | One carbon pool by folate | 1 | 0.126699 | 1.61 |
| rno04380 | Osteoclast differentiation | 6 | 0.128981 | 1.42 |
| rno04066 | HIF-1 signaling pathway | 5 | 0.136151 | 1.43 |
| rno01524 | Platinum drug resistance | 4 | 0.137085 | 1.47 |
| rno01521 | EGFR tyrosine kinase inhibitor resistance | 4 | 0.137085 | 1.47 |
| rno05213 | Endometrial cancer | 3 | 0.139662 | 1.50 |
| rno05226 | Gastric cancer | 7 | 0.143635 | 1.36 |
| rno04150 | mTOR signaling pathway | 7 | 0.147495 | 1.35 |
| rno04659 | Th17 cell differentiation | 5 | 0.150174 | 1.39 |
| rno05321 | Inflammatiory bowel disease (IBD) | 3 | 0.159057 | 1.42 |
| rno00620 | Pyruvate metabolism | 2 | 0.15909 | 1.45 |
| rno00532 | Glycosaminoglycan biosynthesis - chondroitin sulfate / dermatan sulfate | 1 | 0.162811 | 1.38 |
| rno04137 | Mitophagy - animal | 3 | 0.172508 | 1.38 |
| rno05410 | Hypertrophic cardiomyopathy (HCM) | 4 | 0.175883 | 1.35 |
| rno04910 | Insulin signaling pathway | 6 | 0.181016 | 1.30 |
| rno04340 | Hedgehog signaling pathway | 2 | 0.184847 | 1.35 |
| rno00983 | Drug metabolism - other enzymes | 4 | 0.18767 | 1.32 |
| rno00900 | Terpenoid backbone biosynthesis | 1 | 0.187786 | 1.26 |
| rno04724 | Glutamatergic synapse | 5 | 0.190499 | 1.29 |
| rno04720 | Long-term potentiation | 3 | 0.193383 | 1.32 |
| rno04978 | Mineral absorption | 2 | 0.193667 | 1.32 |
| rno05032 | Morphine addiction | 4 | 0.199734 | 1.29 |
| rno00380 | Tryptophan metabolism | 2 | 0.202589 | 1.29 |
| rno04657 | IL-17 signaling pathway | 4 | 0.205863 | 1.27 |
| rno04924 | Renin secretion | 3 | 0.207718 | 1.28 |
| rno03050 | Proteasome | 2 | 0.211605 | 1.26 |
| rno00534 | Glycosaminoglycan biosynthesis - heparan sulfate / heparin | 1 | 0.213239 | 1.16 |
| rno05030 | Cocaine addiction | 2 | 0.220707 | 1.23 |
| rno03060 | Protein export | 1 | 0.226089 | 1.11 |
| rno04726 | Serotonergic synapse | 5 | 0.228799 | 1.22 |
| rno00230 | Purine metabolism | 7 | 0.234323 | 1.19 |
| rno05418 | Fluid shear stress and atherosclerosis | 6 | 0.235202 | 1.20 |
| rno05412 | Arrhythmogenic right ventricular cardiomyopathy (ARVC) | 3 | 0.237239 | 1.21 |
| rno01040 | Biosynthesis of unsaturated fatty acids | 1 | 0.238992 | 1.07 |
| rno04916 | Melanogenesis | 4 | 0.25036 | 1.18 |
| rno04392 | Hippo signaling pathway - multiple species | 1 | 0.25193 | 1.03 |
| rno04330 | Notch signaling pathway | 2 | 0.257814 | 1.14 |
| rno04926 | Relaxin signaling pathway | 5 | 0.275248 | 1.14 |
| rno05220 | Chronic myeloid leukemia | 3 | 0.275392 | 1.13 |
| rno04922 | Glucagon signaling pathway | 4 | 0.27681 | 1.14 |
| rno05142 | Chagas disease (American trypanosomiasis) | 4 | 0.27681 | 1.14 |
| rno04710 | Circadian rhythm | 1 | 0.277843 | 0.96 |
| rno00500 | Starch and sucrose metabolism | 1 | 0.277843 | 0.96 |
| rno04621 | NOD-like receptor signaling pathway | 6 | 0.283024 | 1.13 |
| rno00280 | Valine, leucine and isoleucine degradation | 2 | 0.286165 | 1.07 |
| rno05134 | Legionellosis | 2 | 0.286165 | 1.07 |
| rno04728 | Dopaminergic synapse | 5 | 0.287206 | 1.12 |
| rno00760 | Nicotinate and nicotinamide metabolism | 1 | 0.303698 | 0.90 |
| rno04668 | TNF signaling pathway | 4 | 0.3038 | 1.09 |
| rno04915 | Estrogen signaling pathway | 5 | 0.305345 | 1.10 |
| rno00051 | Fructose and mannose metabolism | 1 | 0.329384 | 0.85 |
| rno04130 | SNARE interactions in vesicular transport | 1 | 0.329384 | 0.85 |
| rno04725 | Cholinergic synapse | 4 | 0.338053 | 1.04 |
| rno04625 | C-type lectin receptor signaling pathway | 4 | 0.338053 | 1.04 |
| rno00250 | Alanine, aspartate and glutamate metabolism | 1 | 0.342133 | 0.83 |
| rno05217 | Basal cell carcinoma | 2 | 0.352933 | 0.95 |
| rno04727 | GABAergic synapse | 3 | 0.353996 | 1.00 |
| rno05210 | Colorectal cancer | 3 | 0.353996 | 1.00 |
| rno04614 | Renin-angiotensin system | 1 | 0.354805 | 0.80 |
| rno04912 | GnRH signaling pathway | 3 | 0.369834 | 0.98 |
| rno00350 | Tyrosine metabolism | 1 | 0.379879 | 0.76 |
| rno00260 | Glycine, serine and threonine metabolism | 1 | 0.379879 | 0.76 |
| rno00010 | Glycolysis / Gluconeogenesis | 2 | 0.390859 | 0.89 |
| rno00591 | Linoleic acid metabolism | 1 | 0.392264 | 0.74 |
| rno05031 | Amphetamine addiction | 2 | 0.400263 | 0.88 |
| rno04975 | Fat digestion and absorption | 1 | 0.404536 | 0.72 |
| rno04216 | Ferroptosis | 1 | 0.404536 | 0.72 |
| rno03440 | Homologous recombination | 1 | 0.404536 | 0.72 |
| rno03022 | Basal transcription factors | 1 | 0.416689 | 0.71 |
| rno00982 | Drug metabolism - cytochrome P450 | 2 | 0.428216 | 0.84 |
| rno05231 | Choline metabolism in cancer | 3 | 0.44047 | 0.89 |
| rno04962 | Vasopressin-regulated water reabsorption | 1 | 0.440613 | 0.67 |
| rno00071 | Fatty acid degradation | 1 | 0.46399 | 0.64 |
| rno00270 | Cysteine and methionine metabolism | 1 | 0.46399 | 0.64 |
| rno00562 | Inositol phosphate metabolism | 2 | 0.464738 | 0.79 |
| rno00565 | Ether lipid metabolism | 1 | 0.475462 | 0.63 |
| rno00520 | Amino sugar and nucleotide sugar metabolism | 1 | 0.486784 | 0.62 |
| rno03013 | RNA transport | 5 | 0.490363 | 0.89 |
| rno04260 | Cardiac muscle contraction | 2 | 0.526017 | 0.72 |
| rno00140 | Steroid hormone biosynthesis | 2 | 0.526017 | 0.72 |
| rno05132 | Salmonella infection | 2 | 0.526017 | 0.72 |
| rno03460 | Fanconi anemia pathway | 1 | 0.530516 | 0.57 |
| rno00830 | Retinol metabolism | 2 | 0.534456 | 0.71 |
| rno04146 | Peroxisome | 2 | 0.54281 | 0.71 |
| rno05014 | Amyotrophic lateral sclerosis (ALS) | 1 | 0.551415 | 0.55 |
| rno04012 | ErbB signaling pathway | 2 | 0.567344 | 0.68 |
| rno00310 | Lysine degradation | 1 | 0.591222 | 0.51 |
| rno04390 | Hippo signaling pathway | 4 | 0.613912 | 0.76 |
| rno05230 | Central carbon metabolism in cancer | 1 | 0.63721 | 0.47 |
| rno04080 | Neuroactive ligand-receptor interaction | 9 | 0.654495 | 0.83 |
| rno04070 | Phosphatidylinositol signaling system | 2 | 0.657026 | 0.60 |
| rno04210 | Apoptosis | 3 | 0.685903 | 0.65 |
| rno05211 | Renal cell carcinoma | 1 | 0.686936 | 0.43 |
| rno04360 | Axon guidance | 4 | 0.728753 | 0.66 |
| rno05100 | Bacterial invasion of epithelial cells | 1 | 0.737748 | 0.39 |
| rno04723 | Retrograde endocannabinoid signaling | 3 | 0.743791 | 0.60 |
| rno05034 | Alcoholism | 3 | 0.743791 | 0.60 |
| rno04932 | Non-alcoholic fatty liver disease (NAFLD) | 3 | 0.767287 | 0.58 |
| rno04350 | TGF-beta signaling pathway | 1 | 0.792618 | 0.34 |
| rno03008 | Ribosome biogenesis in eukaryotes | 1 | 0.792618 | 0.34 |
| rno04742 | Taste transduction | 1 | 0.803349 | 0.34 |
| rno04140 | Autophagy - animal | 2 | 0.828715 | 0.45 |
| rno03015 | mRNA surveillance pathway | 1 | 0.832643 | 0.31 |
| rno05010 | Alzheimer's disease | 3 | 0.851189 | 0.50 |
| rno00564 | Glycerophospholipid metabolism | 1 | 0.853992 | 0.30 |
| rno04217 | Necroptosis | 2 | 0.885611 | 0.40 |
| rno05016 | Huntington's disease | 3 | 0.894816 | 0.46 |
| rno04550 | Signaling pathways regulating pluripotency of stem cells | 1 | 0.952133 | 0.21 |
| rno04714 | Thermogenesis | 3 | 0.958638 | 0.38 |
| rno05012 | Parkinson's disease | 1 | 0.958729 | 0.21 |
| rno04740 | Olfactory transduction | 1 | 1 | 0.03 |

**Supplementary Table 8.** **Pathways of enrichment analysis KEGG differential genes in CS24W group**

| id | Term | List  Hits | *P* value | Enrichment score |
| --- | --- | --- | --- | --- |
| rno05418 | Fluid shear stress and atherosclerosis | 7 | 1.30E-05 | 6.30 |
| rno04913 | Ovarian Steroidogenesis | 4 | 4.84E-05 | 9.85 |
| rno04933 | AGE-RAGE signaling pathway in diabetic complications | 5 | 0.000107 | 6.52 |
| rno04625 | C-type lectin receptor signaling pathway | 5 | 0.000191 | 5.88 |
| rno00030 | Pentose phosphate pathway | 2 | 0.001358 | 9.00 |
| rno00760 | Nicotinate and nicotinamide metabolism | 2 | 0.001813 | 8.16 |
| rno00982 | Drug metabolism - cytochrome P450 | 3 | 0.001861 | 5.67 |
| rno00051 | Fructose and mannose metabolism | 2 | 0.002164 | 7.68 |
| rno05133 | Pertussis | 3 | 0.002177 | 5.44 |
| rno00750 | Vitamin B6 metabolism | 1 | 0.002499 | 13.05 |
| rno00072 | Synthesis and degradation of ketone bodies | 1 | 0.002499 | 13.05 |
| rno04610 | Complement and coagulation cascades | 3 | 0.003345 | 4.83 |
| rno04512 | ECM-receptor interaction | 3 | 0.003653 | 4.72 |
| rno05204 | Chemical carcinogenesis | 3 | 0.004691 | 4.40 |
| rno00380 | Tryptophan metabolism | 2 | 0.004834 | 5.80 |
| rno05146 | Amoebiasis | 3 | 0.006361 | 4.04 |
| rno00280 | Valine, leucine and isoleucine degradation | 2 | 0.008048 | 4.83 |
| rno04923 | Regulation of lipolysis in adipocyte | 2 | 0.008467 | 4.75 |
| rno00561 | Glycerolipid metabolism | 2 | 0.011245 | 4.28 |
| rno04726 | Serotonergic synapse | 3 | 0.012874 | 3.29 |
| rno00900 | Terpenoid backbone biosynthesis | 1 | 0.013179 | 5.67 |
| rno00010 | Glycolysis / Gluconeogenesis | 2 | 0.013356 | 4.02 |
| rno04145 | Phagosome | 4 | 0.013363 | 2.82 |
| rno00980 | Metabolism of xenobiotics by cytochrome P450 | 2 | 0.015079 | 3.84 |
| rno04926 | Relaxin signaling pathway | 3 | 0.016016 | 3.08 |
| rno04744 | Phototransduction | 1 | 0.016683 | 5.02 |
| rno00650 | Butanoate metabolism | 1 | 0.016683 | 5.02 |
| rno01040 | Biosynthesis of unsaturated fatty acids | 1 | 0.017929 | 4.83 |
| rno04950 | Maturity onset diabetes of the young | 1 | 0.017929 | 4.83 |
| rno04915 | Estrogen signaling pathway | 3 | 0.018205 | 2.97 |
| rno04971 | Gastric acid secretion | 2 | 0.018885 | 3.53 |
| rno00062 | Fatty acid elongation | 1 | 0.019214 | 4.66 |
| rno03020 | RNA polymerase | 1 | 0.019214 | 4.66 |
| rno05167 | Kaposi's sarcoma-associated herpesvirus infection | 4 | 0.020374 | 2.53 |
| rno00590 | Arachidonic acid metabolism | 2 | 0.02097 | 3.39 |
| rno00830 | Retinol metabolism | 2 | 0.02394 | 3.22 |
| rno05020 | Prion diseases | 1 | 0.027694 | 3.84 |
| rno04921 | Oxytocin signaling pathway | 3 | 0.028782 | 2.58 |
| rno00983 | Drug metabolism - other enzymes | 2 | 0.029659 | 2.97 |
| rno04912 | GnRH signaling pathway | 2 | 0.03053 | 2.93 |
| rno04974 | Protein digestion and absorption | 2 | 0.03053 | 2.93 |
| rno04064 | NF-kappa B signaling pathway | 2 | 0.032312 | 2.87 |
| rno04620 | Toll-like receptor signaling pathway | 2 | 0.032312 | 2.87 |
| rno00350 | Tyrosine metabolism | 1 | 0.034035 | 3.43 |
| rno00260 | Glycine, serine and threonine metabolism | 1 | 0.034035 | 3.43 |
| rno00240 | Pyrimidine metabolism | 2 | 0.037002 | 2.72 |
| rno05219 | Bladder cancer | 1 | 0.037398 | 3.26 |
| rno04514 | Cell adhesion molecules (CAMs) | 3 | 0.040154 | 2.32 |
| rno05200 | Pathways in cancer | 7 | 0.042435 | 1.77 |
| rno04922 | Glucagon signaling pathway | 2 | 0.043067 | 2.56 |
| rno05152 | Tuberculosis | 3 | 0.043924 | 2.25 |
| rno05165 | Human papillomavirus infection | 5 | 0.045478 | 1.91 |
| rno00270 | Cysteine and methionine metabolism | 1 | 0.04633 | 2.90 |
| rno00071 | Fatty acid degradation | 1 | 0.04633 | 2.90 |
| rno02010 | ABC transporters | 1 | 0.050102 | 2.78 |
| rno05030 | Cocaine addiction | 1 | 0.050102 | 2.78 |
| rno04930 | Type II diabetes mellitus | 1 | 0.052028 | 2.72 |
| rno04218 | Cellular senescence | 3 | 0.052902 | 2.12 |
| rno04623 | Cytosolic DNA-sensing pathway | 1 | 0.059991 | 2.51 |
| rno05134 | Legionellosis | 1 | 0.064121 | 2.42 |
| rno05144 | Malaria | 1 | 0.066221 | 2.37 |
| rno05205 | Proteoglycans in cancer | 3 | 0.067623 | 1.95 |
| rno04370 | VEGF signaling pathway | 1 | 0.07049 | 2.29 |
| rno04611 | Platelet activation | 2 | 0.070554 | 2.09 |
| rno04010 | MAPK signaling pathway | 4 | 0.071362 | 1.79 |
| rno05217 | Basal cell carcinoma | 1 | 0.079288 | 2.14 |
| rno00480 | Glutathione metabolism | 1 | 0.079288 | 2.14 |
| rno04371 | Apelin signaling pathway | 2 | 0.083026 | 1.95 |
| rno04910 | Insulin signaling pathway | 2 | 0.083026 | 1.95 |
| rno05161 | Hepatitis B | 2 | 0.083026 | 1.95 |
| rno04550 | Signaling pathways regulating pluripotency of stem cells | 2 | 0.085919 | 1.92 |
| rno05332 | Graft-versus-host disease | 1 | 0.088409 | 2.01 |
| rno04664 | Fc epsilon RI signaling pathway | 1 | 0.090737 | 1.98 |
| rno04720 | Long-term potentiation | 1 | 0.090737 | 1.98 |
| rno05031 | Amphetamine addiction | 1 | 0.090737 | 1.98 |
| rno05221 | Acute myeloid leukemia | 1 | 0.090737 | 1.98 |
| rno05140 | Leishmaniasis | 1 | 0.093083 | 1.95 |
| rno04924 | Renin secretion | 1 | 0.095447 | 1.92 |
| rno05330 | Allograft rejection | 1 | 0.095447 | 1.92 |
| rno04261 | Adrenergic signaling in cardiomyocytes | 2 | 0.096381 | 1.83 |
| rno05224 | Breast cancer | 2 | 0.101019 | 1.79 |
| rno05214 | Glioma | 1 | 0.102641 | 1.84 |
| rno04918 | Thyroid hormone synthesis | 1 | 0.105072 | 1.81 |
| rno05218 | Melanoma | 1 | 0.105072 | 1.81 |
| rno04940 | Type I diabetes mellitus | 1 | 0.10998 | 1.76 |
| rno05100 | Bacterial invasion of epithelial cells | 1 | 0.112457 | 1.74 |
| rno05320 | Autoimmune thyroid disease | 1 | 0.112457 | 1.74 |
| rno04970 | Salivary secretion | 1 | 0.117455 | 1.69 |
| rno01524 | Platinum drug resistance | 1 | 0.122509 | 1.65 |
| rno05132 | Salmonella infection | 1 | 0.125056 | 1.63 |
| rno00140 | Steroid hormone biosynthesis | 1 | 0.125056 | 1.63 |
| rno03320 | PPAR signaling pathway | 1 | 0.125056 | 1.63 |
| rno04260 | Cardiac muscle contraction | 1 | 0.125056 | 1.63 |
| rno04146 | Peroxisome | 1 | 0.130188 | 1.59 |
| rno04022 | cGMP - PKG signaling pathway | 2 | 0.130633 | 1.59 |
| rno04530 | Tight junction | 2 | 0.132362 | 1.58 |
| rno04350 | TGF-beta signaling pathway | 1 | 0.13537 | 1.55 |
| rno05323 | Rheumatoid arthritis | 1 | 0.13537 | 1.55 |
| rno05410 | Hypertrophic cardiomyopathy (HCM) | 1 | 0.140598 | 1.52 |
| rno04540 | Gap junction | 1 | 0.140598 | 1.52 |
| rno00230 | Purine metabolism | 2 | 0.141127 | 1.54 |
| rno05010 | Alzheimer's disease | 2 | 0.144688 | 1.52 |
| rno05202 | Transcriptional misregulation in cancers | 2 | 0.144688 | 1.52 |
| rno05416 | Viral myocarditis | 1 | 0.145869 | 1.48 |
| rno05414 | Dilated cardiomyopathy (DCM) | 1 | 0.148521 | 1.47 |
| rno04640 | Hematopoietic cell lineage | 1 | 0.153853 | 1.43 |
| rno04657 | IL-17 signaling pathway | 1 | 0.153853 | 1.43 |
| rno05222 | Small cell lung cancer | 1 | 0.153853 | 1.43 |
| rno01522 | Endocrine resistance | 1 | 0.159224 | 1.40 |
| rno04612 | Antigen processing and presentation | 1 | 0.159224 | 1.40 |
| rno04713 | Circadian entrainment | 1 | 0.167345 | 1.36 |
| rno04070 | Phosphatidylinositol signaling system | 1 | 0.170069 | 1.35 |
| rno04925 | Aldosterone synthesis and secretion | 1 | 0.170069 | 1.35 |
| rno05166 | HTLV-I infection | 3 | 0.170903 | 1.38 |
| rno04916 | Melanogenesis | 1 | 0.1728 | 1.33 |
| rno05016 | Huntington's disease | 2 | 0.174199 | 1.39 |
| rno04510 | Focal adhesion | 2 | 0.191507 | 1.32 |
| rno04668 | TNF signaling pathway | 1 | 0.194895 | 1.23 |
| rno05145 | Toxoplasmosis | 1 | 0.203277 | 1.20 |
| rno04750 | Inflammatory mediator regulation of TRP channels | 1 | 0.208889 | 1.18 |
| rno04015 | Rap1 signaling pathway | 2 | 0.211236 | 1.26 |
| rno04114 | Oocyte meiosis | 1 | 0.211701 | 1.17 |
| rno04810 | Regulation of actin cytoskeleton | 2 | 0.213234 | 1.25 |
| rno04670 | Leukocyte transendothelial migration | 1 | 0.214518 | 1.15 |
| rno04919 | Thyroid hormone signaling pathway | 1 | 0.225819 | 1.12 |
| rno05203 | Viral carcinogenesis | 2 | 0.22734 | 1.21 |
| rno04722 | Neurotrophin signaling pathway | 1 | 0.234326 | 1.09 |
| rno05169 | Epstein-Barr virus infection | 2 | 0.235483 | 1.19 |
| rno04380 | Osteoclast differentiation | 1 | 0.240009 | 1.07 |
| rno04152 | AMPK signaling pathway | 1 | 0.242854 | 1.06 |
| rno04142 | Lysosome | 1 | 0.248548 | 1.04 |
| rno04714 | Thermogenesis | 2 | 0.253996 | 1.14 |
| rno04014 | Ras signaling pathway | 2 | 0.258141 | 1.13 |
| rno04151 | PI3K-Akt signaling pathway | 3 | 0.25949 | 1.16 |
| rno04728 | Dopaminergic synapse | 1 | 0.259951 | 1.01 |
| rno04270 | Vascular smooth muscle contraction | 1 | 0.262804 | 1.00 |
| rno03040 | Spliceosome | 1 | 0.262804 | 1.00 |
| rno04068 | FoxO signaling pathway | 1 | 0.268511 | 0.99 |
| rno00190 | Oxidative phosphorylation | 1 | 0.271365 | 0.98 |
| rno04210 | Apoptosis | 1 | 0.274218 | 0.97 |
| rno04650 | Natural killer cell mediated cytotoxicity | 1 | 0.285629 | 0.95 |
| rno05012 | Parkinson's disease | 1 | 0.294179 | 0.93 |
| rno05034 | Alcoholism | 1 | 0.30556 | 0.90 |
| rno04310 | Wnt signaling pathway | 1 | 0.30556 | 0.90 |
| rno04723 | Retrograde endocannabinoid signaling | 1 | 0.30556 | 0.90 |
| rno04072 | Phospholipase D signaling pathway | 1 | 0.311239 | 0.89 |
| rno05226 | Gastric cancer | 1 | 0.31691 | 0.88 |
| rno04630 | Jak-STAT signaling pathway | 1 | 0.325399 | 0.86 |
| rno04390 | Hippo signaling pathway | 1 | 0.328223 | 0.85 |
| rno04144 | Endocytosis | 2 | 0.348703 | 0.96 |
| rno03013 | RNA transport | 1 | 0.353494 | 0.81 |
| rno04062 | Chemokine signaling pathway | 1 | 0.383945 | 0.75 |
| rno05225 | Hepatocellular carcinoma | 1 | 0.386686 | 0.75 |
| rno04360 | Axon guidance | 1 | 0.389421 | 0.75 |
| rno04020 | Calcium signaling pathway | 1 | 0.413798 | 0.71 |
| rno04024 | cAMP signaling pathway | 1 | 0.44033 | 0.67 |
| rno05168 | Herpes simplex infection | 1 | 0.466219 | 0.64 |
| rno04060 | Cytokine-cytokine receptor interaction | 1 | 0.560217 | 0.54 |
| rno05206 | MicroRNAs in cancer | 1 | 0.614155 | 0.49 |
| rno04080 | Neuroactive ligand-receptor interaction | 1 | 0.701892 | 0.41 |
| rno04740 | Olfactory transduction | 1 | 0.998967 | 0.12 |

**
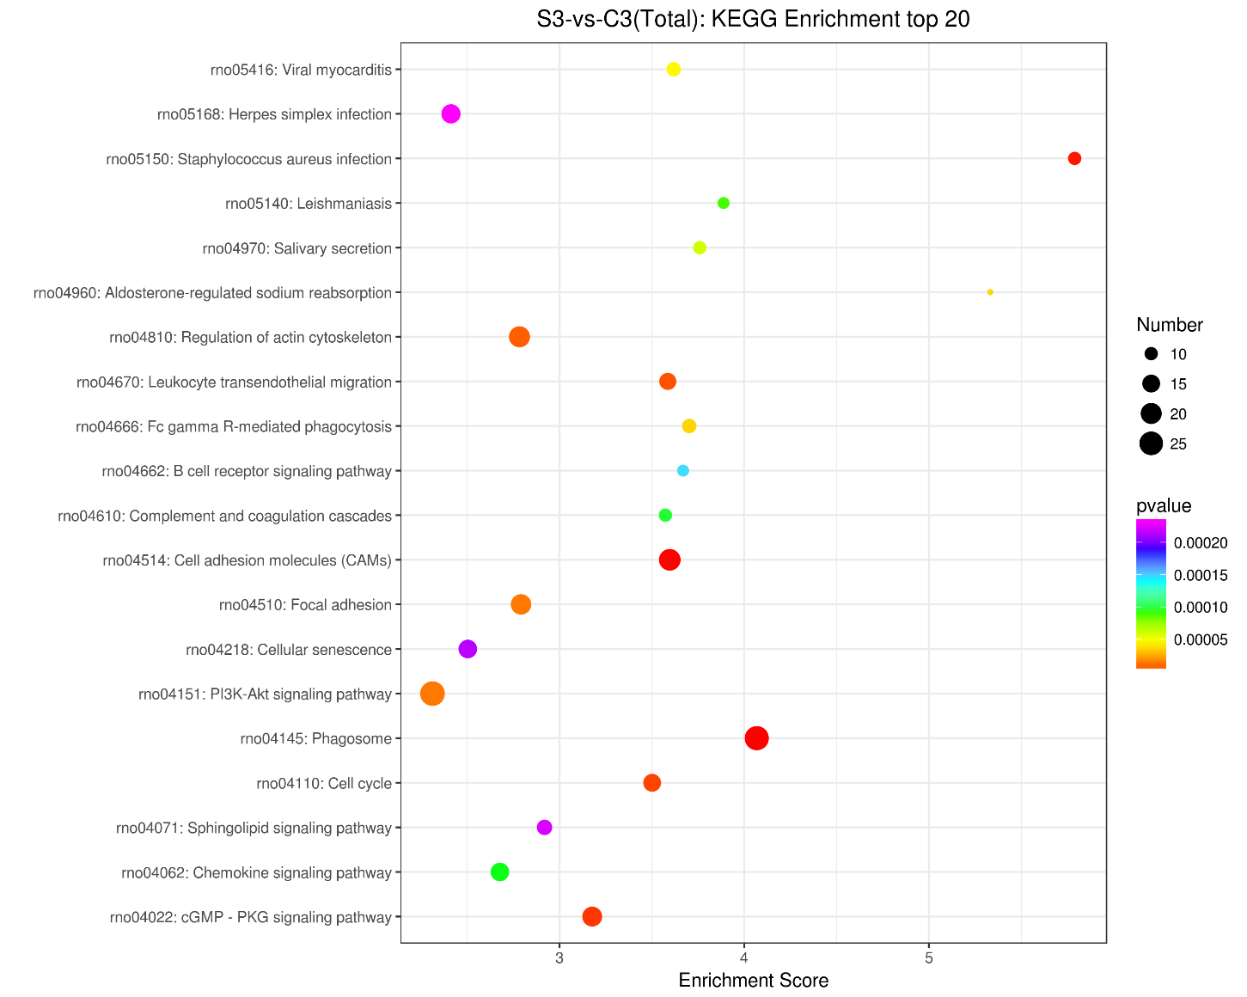
**

**Supplementary Figure 1. Top 20 pathways of enrichment analysis KEGG differential genes in the CS12W group.**

**
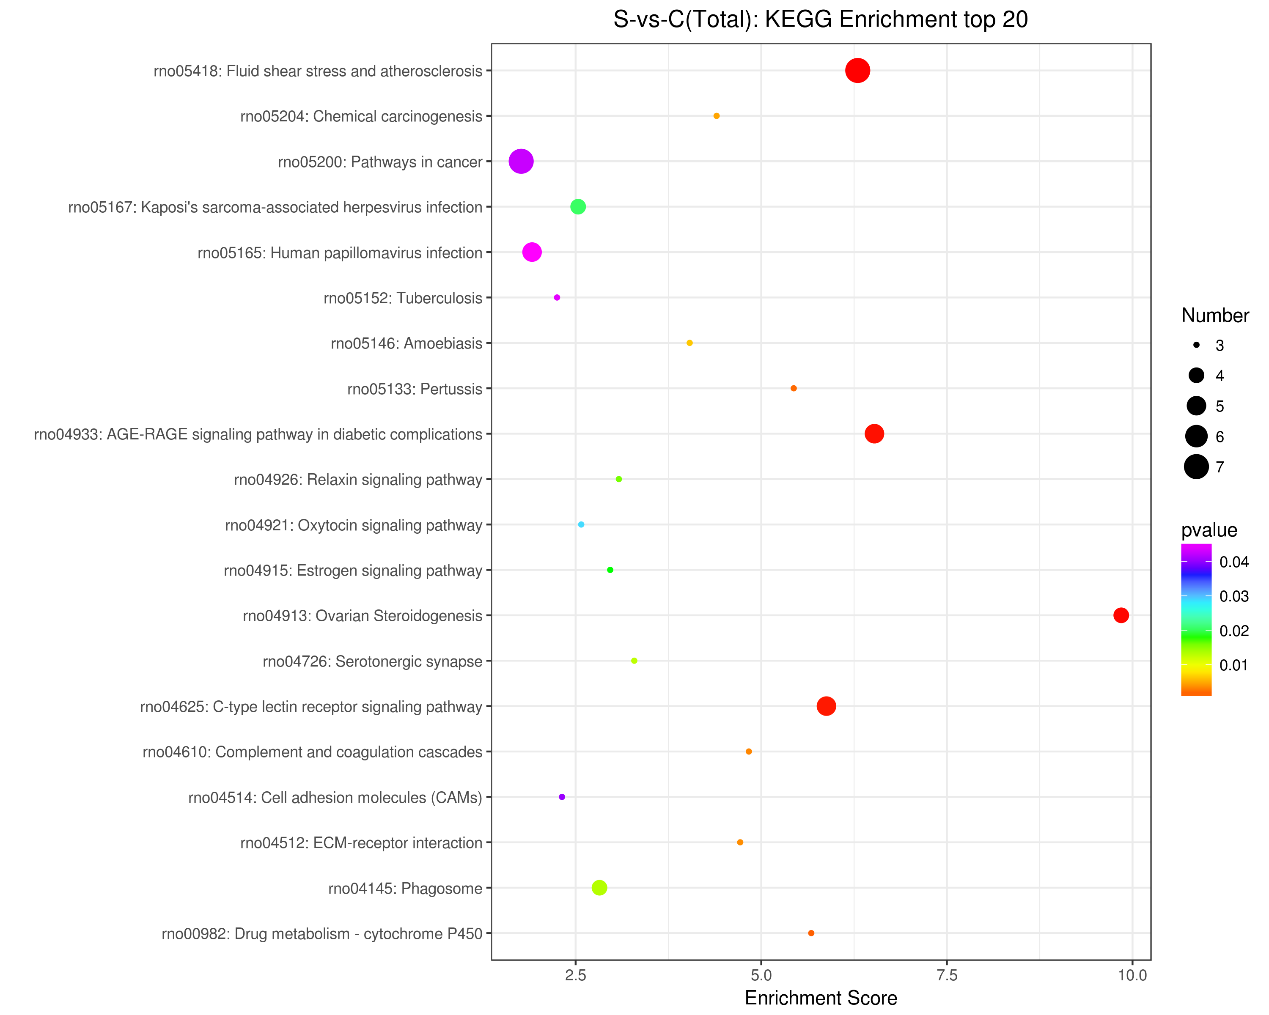
**

**Supplementary Figure 2. Top 20 pathways of enrichment analysis KEGG differential genes in the CS24W group.**
